1                    Lateral Line Ablation by Toxins Results in Distinct Rheotaxis Profiles in Fish

2

3    Kyle C Newton<sup>1\*</sup>, Dovi Kacev<sup>2</sup>, Simon R O Nilsson<sup>3</sup>, Sam A Golden<sup>3</sup>, and Lavinia Sheets<sup>1,4\*</sup>

4

5    <sup>1</sup> Department of Otolaryngology, Washington University School of Medicine, St. Louis, MO, USA

6    <sup>2</sup> Scripps Institution of Oceanography, University of California San Diego, La Jolla, CA, USA

7    <sup>3</sup> Department of Biological Structure, University of Washington, Seattle, WA, USA

8    <sup>4</sup> Department of Developmental Biology, Washington University School of Medicine, St. Louis,

9    MO, USA

10

11    **\* Correspondence:**

12    Kyle C Newton (kyle.newton@wustl.edu)

13    Lavinia Sheets (sheetsl@wustl.edu)

14

15    Keywords: zebrafish, lateral line, neuromast, sensory hair cell, rheotaxis, pose estimation,

16    animal tracking, behavior classification, behavioral profile, machine learning, machine vision

## 17 **ABSTRACT**

18           Zebrafish lateral line is an established model for hair cell organ damage, yet few studies  
19 link mechanistic disruptions to changes in biologically relevant behavior. We used larval  
20 zebrafish to determine how damage via ototoxic chemicals impact rheotaxis. Larvae were  
21 treated with CuSO<sub>4</sub> or neomycin to disrupt lateral line function then exposed to water flow  
22 stimuli. Their swimming behavior was recorded, and DeepLabCut and SimBA software were  
23 used to track movements and classify rheotaxis behavior. Lateral line-disrupted fish performed  
24 rheotaxis, but they swam greater distances, for shorter durations, and with greater angular  
25 variance than controls. Further, spectral decomposition analyses demonstrated that lesioned  
26 fish exhibited toxin-specific behavioral profiles with distinct fluctuations in the magnitude, timing,  
27 and cross-correlation between changes in linear and angular movements. Our observations  
28 support that lateral-line input is needed for fish to perform rheotaxis efficiently in flow and  
29 reveals commonly used lesion methods have unique effects on behavior.

30

## 31 **INTRODUCTION**

32           The lateral line is a sensory system used by fishes and amphibians to detect water flow.  
33 The functional units of the lateral line are neuromasts; bundles of sensory hair cells located  
34 externally along the head and body that mechanotransduce low frequency ( $\leq 200$  Hz) water flow  
35 stimuli into electrochemical signals for interpretation by the central nervous system (reviewed in  
36 <sup>1</sup>). The lateral line is known to partially mediate rheotaxis, a multimodal behavior (<sup>2</sup>) that  
37 integrates input from visual (<sup>3, 4, 5</sup>), vestibular (<sup>6, 7</sup>), tactile (<sup>3, 8, 9, 10</sup>), and lateral line systems (<sup>9, 10</sup>,  
38 <sup>8</sup>) to facilitate fish orientation and movement with respect to water flow (<sup>9, 10</sup>).

39           Although contribution from the lateral line is well established, there is conflicting  
40 evidence on whether it is essential for rheotaxis in fish (<sup>2, 5, 9, 10, 11, 12</sup>). Inconsistent  
41 methodologies used on several species that differentially rely on the lateral line to mediate  
42 behavior obfuscate the relationship between the lateral line and rheotaxis. However, a recent

43 review hypothesized that differences in the spatial characteristics and velocity of the flow stimuli  
44 used to assay rheotaxis likely resulted in the disparate results reported in these studies (see  
45 Table 1 in <sup>13</sup>).

46 Zebrafish hair cells demonstrate unique regenerative features that make them an  
47 important model for hearing loss research (<sup>14, 15, 16, 17, 18, 19</sup>). Many studies have focused on  
48 mechanistic disruption of hair cell activity, but few have explored the association between this  
49 disruption and behavior. Previous researchers have developed several different assays to study  
50 rheotaxis in larval fishes (e.g. <sup>5, 20, 21, 22</sup>). However, we sought to develop a behavioral assay  
51 and analytical methodology that is sensitive, spatiotemporally scalable, and robust enough to be  
52 used on a variety of species, ontogenetic stages, sensory modalities, and behavioral responses  
53 that are pertinent to biomedical and ecological research.

54 We therefore investigated how the lateral line contributes to rheotaxis in larval zebrafish  
55 and developed a standardized assay that could identify previously observed subtle differences  
56 in rheotaxis behavior (<sup>12</sup>). We compared the rheotaxis response of fish with an intact lateral line  
57 to those with lateral lines ablated by two commonly used compounds: copper sulfate (CuSO<sub>4</sub>; <sup>17,</sup>  
58 <sup>23, 24, 25</sup>) and neomycin (<sup>5, 15, 26</sup>). We hypothesized that different toxins produce distinct changes  
59 in rheotaxis behavior because they injure lateral lines via different cellular mechanisms (<sup>27</sup>), and  
60 that these changes may be quantified objectively with machine vision and learning techniques.

61

## 62 **RESULTS & DISCUSSION**

63 To determine the contribution of the lateral line to rheotaxis in fishes we used CuSO<sub>4</sub>  
64 and neomycin to ablate the lateral line neuromasts of larval zebrafish (6-7 days post-fertilization  
65 (dpf)), then video recorded the swimming behavior of individual larvae in a microflume under no-  
66 flow and flow stimulus conditions (Fig. 1). Although it was not possible to selectively block tactile  
67 cues, young larval zebrafish are not known to detect horizontal angular velocity cues (i.e. yaw)  
68 and our procedures eliminated linear acceleration and visual cues (see methods). We used

69 machine vision and learning software to annotate videos for positive rheotaxis events where fish  
70 were oriented to  $0^\circ \pm 45^\circ$  and actively swam into the oncoming flow (Fig. 2). Under no flow  
71 conditions, we determined that each treatment group of fish was randomly distributed (Fig. 3;  
72 Supplementary Table 1) and had no natural proclivity to orient their bodies to  $0^\circ \pm 45^\circ$   
73 (Supplementary Table S2). We standardized our analyses by comparing rheotaxis data  
74 acquired during flow to the swimming behavior of fish when they were randomly oriented at  $0^\circ \pm$   
75  $45^\circ$  under no flow. A subset of all fish that had undergone behavioral testing were fixed and  
76 immunolabeled to confirm lateral line organ ablation (Supplementary Fig. 1).

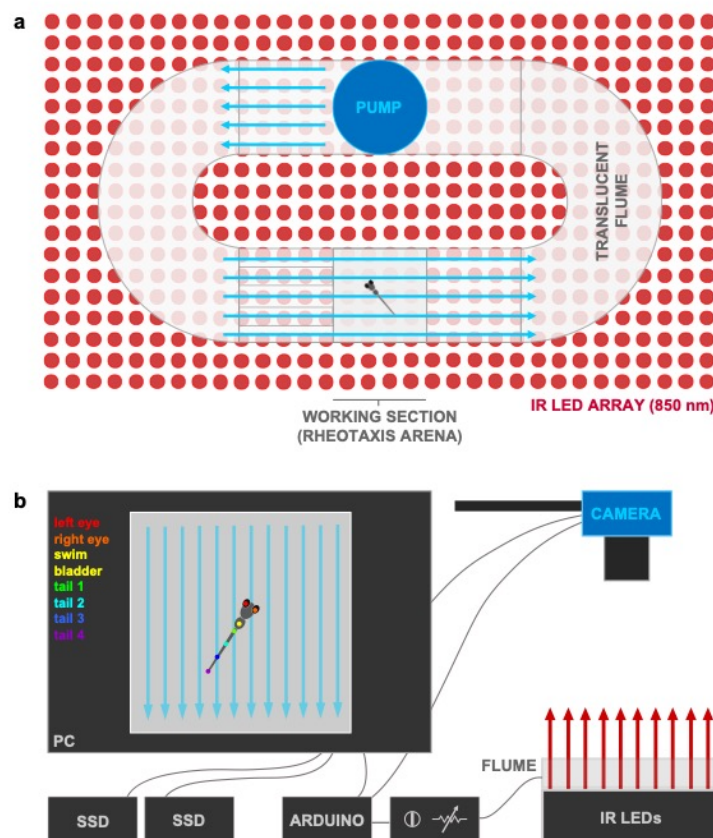

77

78 **Figure 1. Experimental microflume used to conduct rheotaxis assays under IR illumination.** a) The microflume (220 x 100 x  
79 40 mm) with a removeable working section (30 x 30 x 10 mm) was 3D printed from translucent resin and placed on top of an  
80 infrared (850 nm) LED array. b) Schematic of experimental set-up. The IR light passed through the flume and the overhead camera  
81 recorded rheotaxis trials at either 200 or 60 fps onto SD cards. The timing and duration for the camera and flume pump onset and  
82 offset of was controlled by an Arduino and pump voltage (i.e. water flow velocity  $\sim 10 \text{ mm s}^{-1}$ ) was controlled by a rheostat. Each

83 trial was monitored via the live camera feed displayed on the PC and all videos were copied in duplicate onto a 10TB RAID array.  
84 Dots on fish larva indicate seven body positions tracked by DeepLabCut.  
85

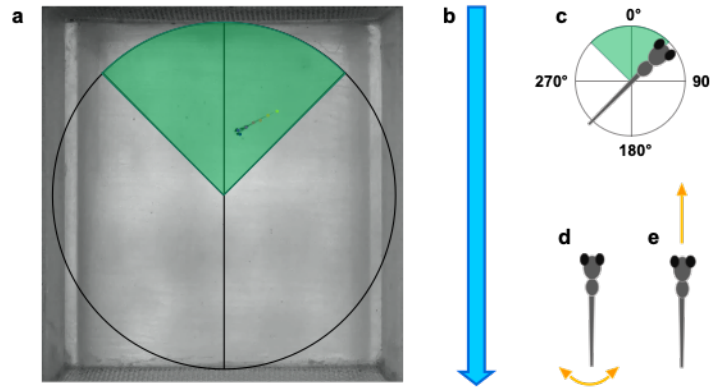

86  
87 **Figure 2. Definition of positive rheotaxis behavior.** a) Larval zebrafish in the microflume arena performing rheotaxis under flow  
88 as defined by multiple conditions, including: b) the water flow stimulus was on; c) the fish body angle was oriented to  $0^\circ \pm 45^\circ$  (green  
89 shaded wedge); d) the tail moved laterally every 100 ms; and e) the body of the fish had forward translation every 100 ms. Note that  
90 conditions (d) and (e) were used to discriminate between fish displaying positive rheotaxis and those passively drifting backward  
91 with body angles of  $0^\circ \pm 45^\circ$ .  
92

### 93 *Lateral Line Ablation Alters but Does Not Eliminate Rheotaxis Behavior*

94 We predicted that fish treated with the minimum dosage of  $\text{CuSO}_4$  or neomycin  
95 necessary to completely ablate lateral line hair cells of the lateral line would not perform  
96 rheotaxis as well as control fish with an intact lateral line. Surprisingly, fish lacking intact lateral  
97 line organs could still orient into oncoming flow similar to control fish (Fig. 3; Supplementary  
98 Tables 1-2), indicating that the effects of lateral line ablation were subtle and not essential for  
99 rheotaxis behavior.

100 When analyzing individual components of rheotaxis, stark behavioral changes were  
101 observed among lesioned fish. Comparisons between lateral line-ablated and control groups  
102 showed significant differences in the mean body angle or angular variance (Fig. 3,  
103 Supplementary Table 3), mean duration of rheotaxis events, mean number of rheotaxis events,  
104 total distance traveled, and latency to the onset of rheotaxis (Fig. 4, Supplementary Tables 4-7).

105 These observations suggest that rheotaxis occurs but is altered in lateral line-ablated groups,  
106 contrasting with previous reports on larval zebrafish (<sup>5, 22, 28</sup>) and supporting the idea that the  
107 lateral line is not required for rheotaxis in fish (<sup>2, 11, 12, 29, 30</sup>). We believe that our focus on acute  
108 rheotaxis behavior and use of fine scale spatiotemporal sampling and machine vision allowed  
109 us to detect subtle changes in rheotaxis behavior that were overlooked in previous studies (<sup>2, 5,</sup>  
110 <sup>12, 29, 30</sup>). Our methods eliminated water motion, optic flow (<sup>3</sup>), and certain vestibular cues (yaw:  
111 <sup>31, 32</sup>; linear acceleration: see methods). However, tactile cues were not eliminated because we  
112 could not prevent fish from contacting the substrate and our flow rate was sufficient to displace  
113 substrate coupled fish backward and against the rear mesh of arena. Therefore, we propose  
114 that lateral line ablated fish predominantly used tactile cues to gain an external frame of  
115 reference and perform rheotaxis (<sup>8, 10</sup>).

116

#### 117 *Toxins Differentially Influence the Distribution of Mean Body Angles During Flow*

118 To identify differences in body orientation, the mean body angle for fish in the presence  
119 or absence of flow stimuli were compared among treatment groups (Fig. 3). Since flow  
120 originated at the top of the flume (located at 0°), mean body angle was determined relative to  
121 the oncoming water stimulus. Angular variance of each group is represented by the inverse of  
122 the mean resultant vector length (i.e. short vectors = high variance, and vice versa; Fig. 3).  
123 Under no flow, fish from each treatment group swam with a random orientation, indicated by a  
124 grand mean body angle that was statistically different from 0° and resultant vector length close  
125 to zero (Fig. 3a, Supplementary Table 2). When flow was applied, all groups exhibited a grand  
126 mean body angle clustered around 0° and resultant length close to one (Fig. 3b-c), thus  
127 demonstrating significant alignment into the oncoming flow stimulus.

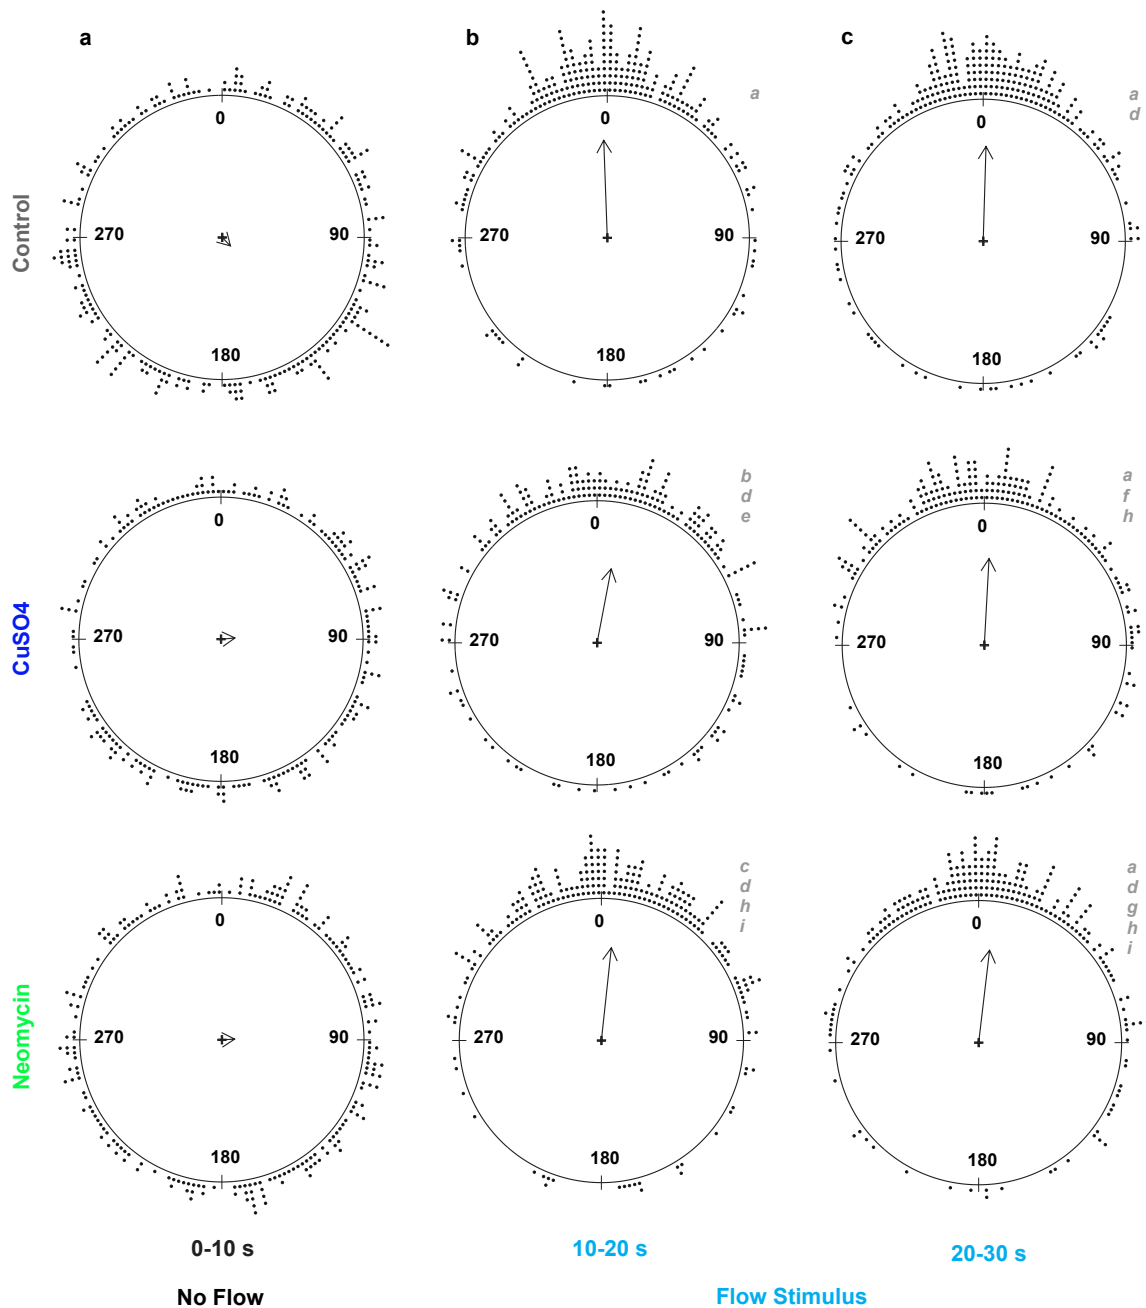

128

129 **Figure 3. The mean resultant vectors of fish treatment groups before and during water flow stimulus indicates fish with**  
 130 **lateral-line organs ablated by CuSO<sub>4</sub> or neomycin can still perform rheotaxis.** Each dot outside the circles represents the mean  
 131 body angle of an individual fish for the 10 s duration of the no flow and flow stimulus conditions. The grand mean vector for each  
 132 group is represented by a summary vector with an angle,  $\theta$ , and a mean resultant length,  $\rho$ , where the length of the vector  
 133 represents the distribution of individual angles around the mean angle of the group. The length of the vector ranges from zero for  
 134 uniform distributions, to one for distributions perfectly aligned with the mean angle. Consequently, the angular variance ( $1 - \rho$ ) is  
 135 inversely related to vector length. Under no flow ( $t = 0-10$  s), groups of lateral line intact (control) and lesioned (CuSO<sub>4</sub>, neomycin)

136 fish have a random distribution of individual mean body angles. Under flow, all groups show a statistically significant orientation to  $0^\circ$   
137  $\pm 45^\circ$ , but the distributions of the individual mean angles within the groups differ between the initial (t = 10-20 s) and final (t = 20-30  
138 s) stimulus bins. Distributions with the same lowercase letter indicate groups that do not differ statistically.

139

140 During rheotaxis, post-hoc comparisons within treatment groups showed a significant  
141 difference in the homogeneity of distributions between initial and final portions of the flow  
142 stimulus, indicating that overall orientation behavior within groups was not consistent for the  
143 duration of flow presentation (Fig. 3b-c, Supplementary Table 3). Comparisons among groups  
144 within the initial 10s portion of flow showed a significant difference in the distribution of mean  
145 body angles between control and  $\text{CuSO}_4$  fish, and between control and neomycin fish (Fig. 3b,  
146 Supplementary Table 3). There was also an interaction between treatment and stimulus where  
147 the distribution of mean body angle in  $\text{CuSO}_4$ -ablated fish during the initial stimulus bin was  
148 different than that of neomycin fish during the final sequence (Supplementary Table S3),  
149 suggesting that these lesion methods differentially impacted the rheotaxis behavior of fish.

150

151 *Lateral Line-Ablated Fish Performed Rheotaxis for Shorter Durations but Travelled Longer*  
152 *Distances*

153 Although intact lateral line was not required to perform rheotaxis, lesioned fish behaved  
154 differently than non-lesioned fish in flow stimulus, indicating that lack of input from neuromast  
155 hair cells affected swimming behavior. To quantify differences in rheotaxis behavior, we  
156 accounted for the random effects of individual variation then compared the mean duration and  
157 mean number of rheotaxis events, total distance travelled, and latency between flow  
158 presentation and behavior onset among groups. We standardized the data by comparing events  
159 of rheotaxis to events when fish were randomly oriented at  $0^\circ \pm 45^\circ$  under no flow and hereafter  
160 refer to both conditions as “events”.



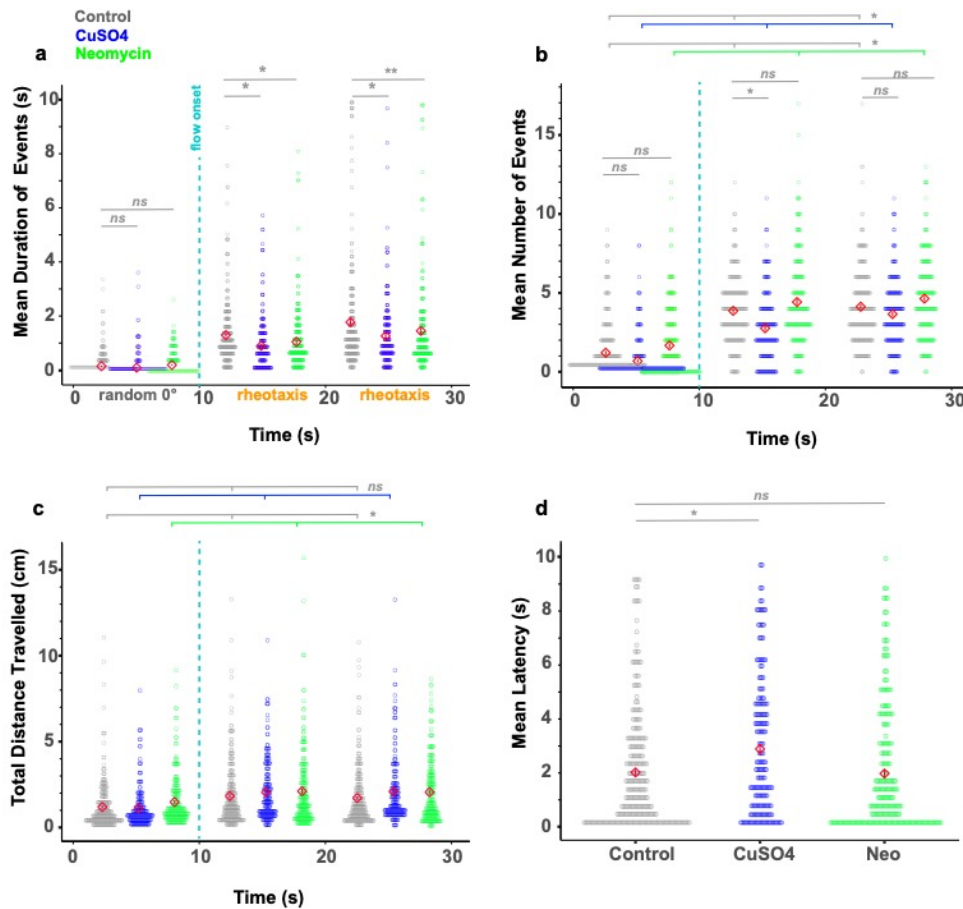

161

162 **Figure 4. Lateral line ablated fish performed rheotaxis for shorter mean durations yet travelled greater total distances**

163 **compared to controls.** Red diamonds in each plot indicate the mean ± SE values. a) Lateral line intact (gray = control, n=248) fish  
 164 have a longer mean duration of rheotaxis events during flow stimulus than lesioned fish (blue = CuSO<sub>4</sub>, n = 204; green = neomycin,  
 165 n = 222; 18 experimental sessions). b) The mean number of 0° orientation and rheotaxis events was greatest for neomycin fish and  
 166 the least for CuSO<sub>4</sub> fish under no flow and flow conditions, respectively. c) Under no flow, neomycin fish traveled a greater total  
 167 distance than control and CuSO<sub>4</sub> fish; but under flow, neomycin and CuSO<sub>4</sub> fish traveled a greater total distance than control fish. d)  
 168 Compared to control and neomycin fish, CuSO<sub>4</sub> fish had the longest mean latency to the onset of the first rheotaxis event after flow  
 169 stimulus presentation. Lines indicate statistical comparisons between control and treatment groups (see Supplementary Tables 4-7).  
 170 The effects of treatment are indicated by long color-coded bars with branches, whereas interactions are indicated with short bars.  
 171 There was a significant effect of stimulus in a-c (not shown for clarity). Significance values: \* = 0.05, \*\* = 0.01

172

173 Without flow, the mean duration of random orientation events did not differ among  
 174 treatment groups (Fig. 4a, Supplementary Table 4). With flow, the mean duration of rheotaxis  
 175 events increased for each group, and was greatest in the controls, less in neomycin-, and least  
 176 in CuSO<sub>4</sub>-treated fish (Fig. 4a, Supplementary Table 4). An interaction between stimulus and

177 treatment was seen during the initial 10s of flow only in the CuSO<sub>4</sub> treatment cohort, but during  
178 the final 10s the differences among all treatments became significant (Supplementary Table 4).  
179 Mean number of events had a significant effect of stimulus and an effect of treatment where the  
180 number of events was greatest in neomycin-treated, less in controls, and least in CuSO<sub>4</sub>-treated  
181 under no flow and flow conditions (Fig. 4b, Supplementary Table 5). The total distance travelled  
182 during events was influenced by presence of flow stimulus and type of lesion, where neomycin-  
183 treated fish travelled further than control and CuSO<sub>4</sub>-treated fish in the presence or absence of  
184 flow conditions (Fig. 4c, Supplementary Table 6). CuSO<sub>4</sub>-lesioned fish also demonstrated a  
185 greater delay in initiating rheotaxis compared to control and neomycin fish (Fig. 4d,  
186 Supplementary Table S7). Altogether, our data show that an intact lateral line allowed fish to  
187 sustain rheotaxis into oncoming flow for longer durations yet travel shorter distances,  
188 suggesting that toxins reduce zebrafish economy of motion against flow stimulus. These results  
189 support the idea that the lateral line allows epibenthic fish to hold their station with respect to the  
190 substrate (<sup>2</sup>, <sup>33</sup>)

191 Interestingly, CuSO<sub>4</sub> and neomycin affected swimming behavior against flow stimulus in  
192 different ways. CuSO<sub>4</sub> exposure decreased activity, as evidenced by fewer rheotaxis events  
193 with greater latency between flow and behavior initiation. This contrasts with the neomycin-  
194 exposed fish, that exhibited frequent bursts of rheotaxis, and longer distances travelled. We  
195 propose that the distinct effects of CuSO<sub>4</sub> and neomycin treatments on the spatiotemporal  
196 nature of rheotaxis may be due, in part, to their different mechanisms of neuromast ablation.  
197 Hair cells were completely ablated and supporting cells and afferent neurons damaged at the  
198 dosage used for CuSO<sub>4</sub> (<sup>17</sup>), but on occasion a few hair cells remained in neomycin-treated fish  
199 (Supplementary Fig. 1). If residual hair cells retained some functionality in the neomycin group  
200 despite severe morphological damage, then it is possible that their sensitivity might have been  
201 amplified through efferent modulation (<sup>34</sup>) or previously silent hair cells were recruited to  
202 compensate for reduced sensory input (<sup>35</sup>). In addition, while zebrafish larvae have been shown

203 to be relatively resistant to the concentration and exposure time of CuSO<sub>4</sub> used (<sup>36</sup>), subtle  
204 differences in behavior may also be a consequence of nonspecific neural toxicity.

205

### 206 *Overall Spatial Use of the Arena During Rheotaxis Differs Among Treatments*

207 During flow, we observed that lateral line-lesioned fish were often pushed against the  
208 back of the testing arena, whereas intact fish were often swimming at the front of the arena near  
209 the flow source. To quantify this observation, the density of fish throughout the duration of the  
210 experiment was plotted in one- and two-dimensional (1D, 2D) space and then compared among  
211 treatments.

212 Along the X-axis, the spatial use was similar among treatment groups and flow  
213 conditions (Fig. 5a). All groups preferred the sides over the middle of the arena. Without flow,  
214 fish that were placed into the arena remained close to the walls as they explored the  
215 boundaries. With flow, preference for the sides became more pronounced due to gradients in  
216 the laminar flow field where the highest velocities occurred at the surface and left side and the  
217 lowest velocities at the bottom and right side (Supplementary Fig. 2). These boundary layers  
218 provided a refuge (e.g. <sup>37</sup>) for intact and lesioned fish alike to reduce their energetic costs (<sup>38</sup>).

219 By contrast, the spatial use of fish along the Y-axis differed significantly among  
220 treatment groups and became more prominent during flow conditions (Fig. 5b). Under flow, the  
221 control group predominantly used the front region (Fig. 5b), demonstrating that an intact lateral  
222 line allowed these fish to maintain their position at the front of the arena where the flow was  
223 strongest. Conversely, the predominant location of toxin-treated groups was shifted toward the  
224 back region, suggesting an impaired ability to station hold and increased reliance on tactile cues  
225 provided by contact with the rear grate. CuSO<sub>4</sub>-lesioned fish exhibited a greater shift towards  
226 the back of the arena than neomycin-lesioned fish (Fig. 5b), but both groups demonstrated this  
227 abnormal distribution along the Y-axis compared to control fish.

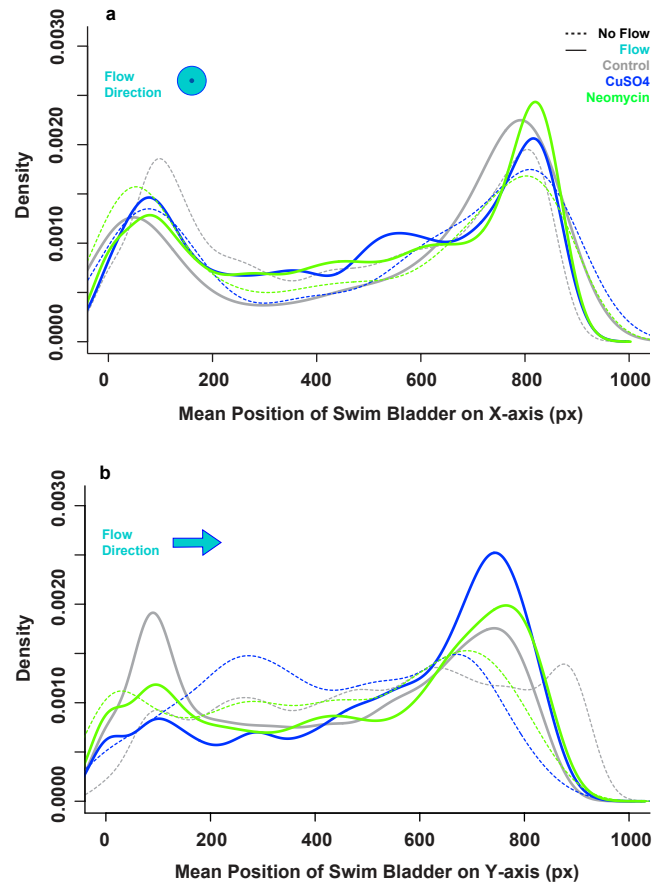

228

229 **Figure 5. Intact lateral line allowed fish to hold their position near the source of the flow.** a) The total spatial use of the arena  
230 in the X- dimension (left to right) does not differ among treatments (gray = control, blue = CuSO<sub>4</sub>, green = neomycin) or flow  
231 conditions (none = dotted lines, flow = solid lines). All fish preferred to occupy the right versus the left side of the arena.  
232 b) in the Y- dimension (front to back) under no flow conditions, the CuSO<sub>4</sub> treated fish occupied the center of the arena more than  
233 the control or neomycin treated fish. However, under flow conditions, the lateral line intact (control; gray solid line) fish occupied the  
234 front of the arena, whereas lesioned fish (blue and green solids lines) predominantly occupied the back of the arena.

235

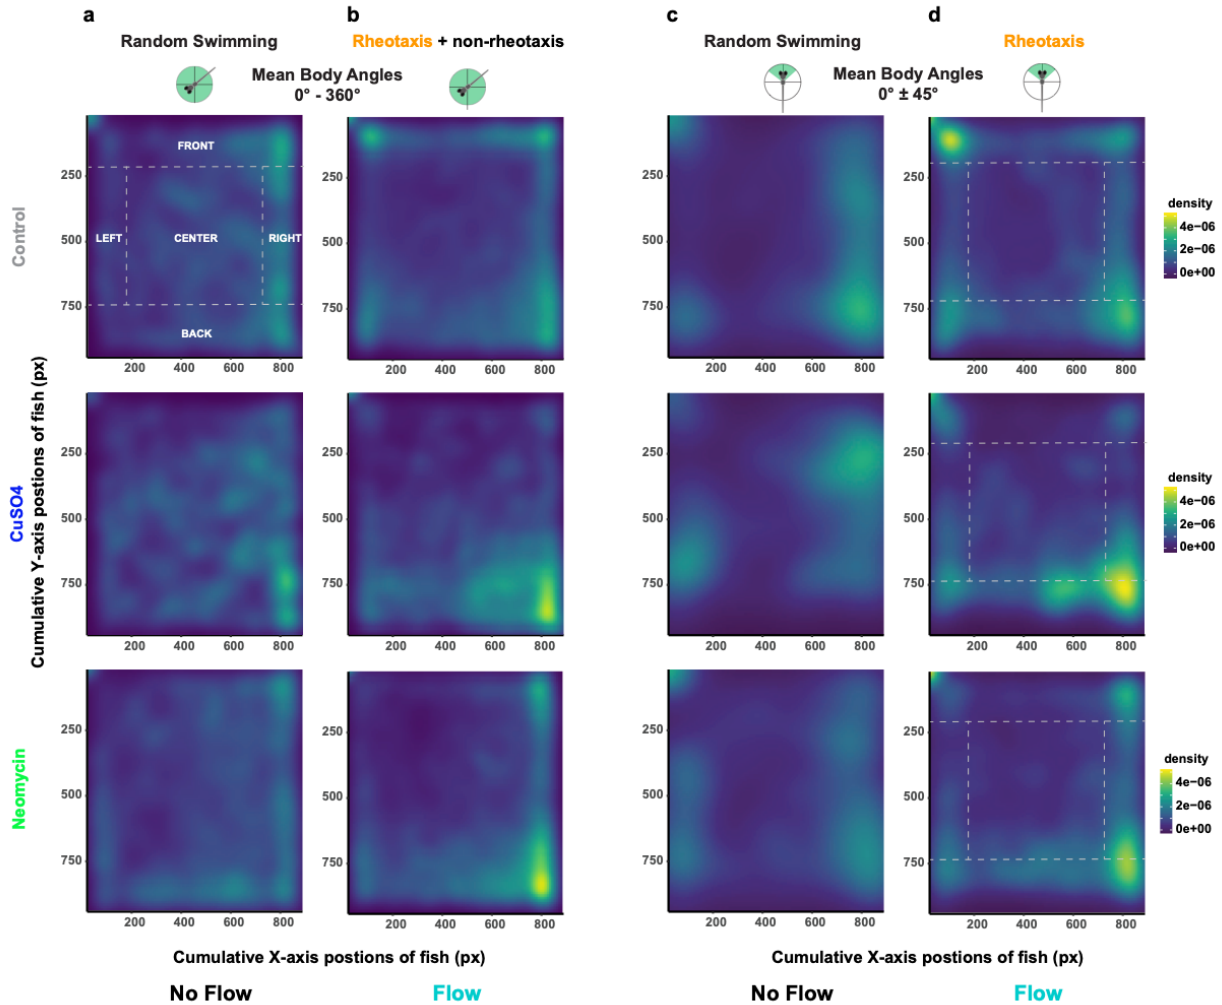

236

237 **Figure 6. Under flow, lateral line intact (control) fish used the front part of the arena near the source of the flow, whereas**  
 238 **lesioned (CuSO<sub>4</sub>, neomycin) fish use the back portion of the arena.** a-b) For all possible mean body angles (0°- 360°): a) all  
 239 all treatment groups of fish show similar density, or total spatial use, of the arena under no flow conditions; b) however, the controls  
 240 used the front of the arena and the lesioned fish used the back of the arena under flow. c-d) Filtering the data for mean body angles  
 241 required for rheotaxis (0° ± 45°): c) all groups clustered along the left and right sides of the arena under no flow; d) but under flow,  
 242 the controls used the front-left and the lesioned use the back-right portions of the arena. Dotted lines and labels in capital letters  
 243 indicate spatial regions of interest (ROI). For clarity, statistical comparisons among treatment and ROIs were not included in the  
 244 figure; however, there were significant fixed effects for CuSO<sub>4</sub> and neomycin treatments, the back ROI, and interactions between  
 245 treatment and ROI (Supplementary Table 8).

246

247 The spatial use of the arena in 2D further illustrates differences among treatment groups  
 248 under flow. During rheotaxis, the total density of fish in 2D space was parsed out over five  
 249 regions of interest (ROI, Fig. 6a) set according to size of fish, their orientation during rheotaxis,  
 250 and the dimensions of the flow field. Generalized linear models (Supplementary Table 8)

251 indicate that the spatial use of fish during rheotaxis differed among all three treatment groups.  
252 (Fig. 6d). During flow, control fish frequently maintained position in the upper-left corner of the  
253 arena whereas lesioned fish primarily occupied the back-right corner (Fig. 6d), suggesting that a  
254 functional lateral line enables fish to occupy the areas of strongest flow. The propensity of  
255 lesioned fish to be swept backwards yet still perform rheotaxis behavior without visual cues  
256 likely demonstrates that they relied on tactile cues to provide the external frame of reference  
257 necessary to orient and swim against flow (<sup>2, 8, 10</sup>). Cumulatively, these observations support  
258 that the sensory information provided by lateral line organs, in conjunction with the tactile  
259 system, allowed intact fish to actively maintain their position within a non-uniform laminar flow  
260 field where the velocity of water is greatest (<sup>2</sup>).

261

#### 262 *Lateral Line Ablation Reduces the Proportion of Individual Fish that Perform Rheotaxis*

263 During flow presentation, the control group had the greatest proportion of individual fish  
264 that performed rheotaxis during the experiment (as defined in Fig. 2) followed by neomycin-  
265 treated then CuSO<sub>4</sub>-treated groups (Fig. 7). Intact fish plateaued relatively quickly compared to  
266 lesioned fish, but the values for all three groups converged during the final few seconds of flow  
267 presentation.

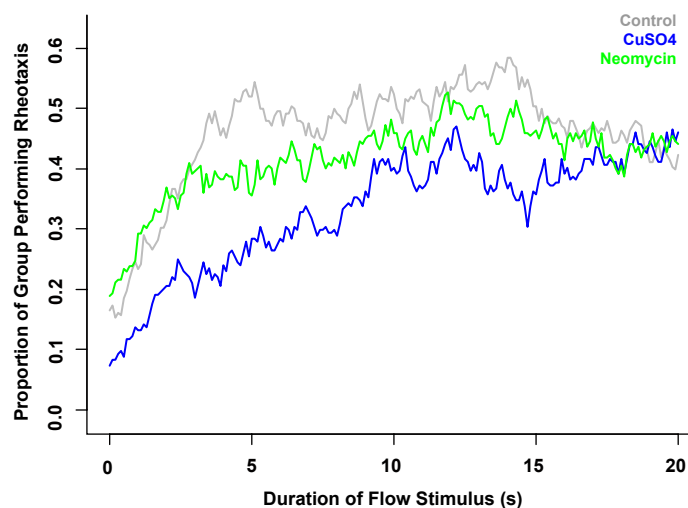

268

269 **Figure 7. Intact lateral line enabled a greater proportion of fish to perform rheotaxis within the first 15 seconds of stimulus**  
270 **onset.** Time series of the proportion of individual fish within each group that performed rheotaxis during flow presentation. A greater  
271 proportion of lateral line intact (gray = control) fish performed rheotaxis than lesioned (blue = CuSO<sub>4</sub>, green = neomycin) fish. The  
272 data for all treatments converges after 17 s of flow presentation.

273

274 *Spectral Decomposition Shows that Lateral Line Ablation Impacts the Trend and Degree of*  
275 *Periodic Fluctuation in Linear and Angular Movement*

276 To uncover the impact that lateral line ablation had on the swimming kinematics of fish,  
277 we analyzed how the magnitude of the linear (relative distance moved, relative velocity,  
278 relative acceleration) and angular movements (mean body angle, mean length of the resultant  
279 vector) changed over time. We observed that all treatment groups swam in the burst-and-glide  
280 style that is characteristic of larval zebrafish with intact lateral lines, but with noticeable  
281 differences in the quality of their movement. Because the lateral line is thought to mediate  
282 station holding behavior (<sup>2</sup>, <sup>33</sup>, <sup>38</sup>), we postulated that, under flow, the magnitude of the  
283 oscillations in relative linear and angular movements of lateral line-intact fish would be smaller  
284 than those of lesioned fish. The observed time series data (Fig. 8a, d, g; Supplementary Fig. 3  
285 a, d) had a “seismic” appearance where noise masked the underlying signal. Therefore, we  
286 removed the random noise (Supplementary Fig. 3g-k) and decomposed the observed datasets  
287 into their fundamental components: the large scale trends in the magnitude of movements  
288 during the entire experiment (Fig. 8b, e, h; Supplementary Fig. 3 b, e) and the small scale  
289 periodicity, which indicates the recurring fluctuations in movement magnitude that occurred  
290 during any given second of the experiment (Fig. 8c, f, i). Only relative movement data are  
291 shown in Fig. 8 to provide visual clarity because the relative velocity and acceleration periodicity  
292 data showed similar fluctuations (Supplementary Fig. 3 c, f).

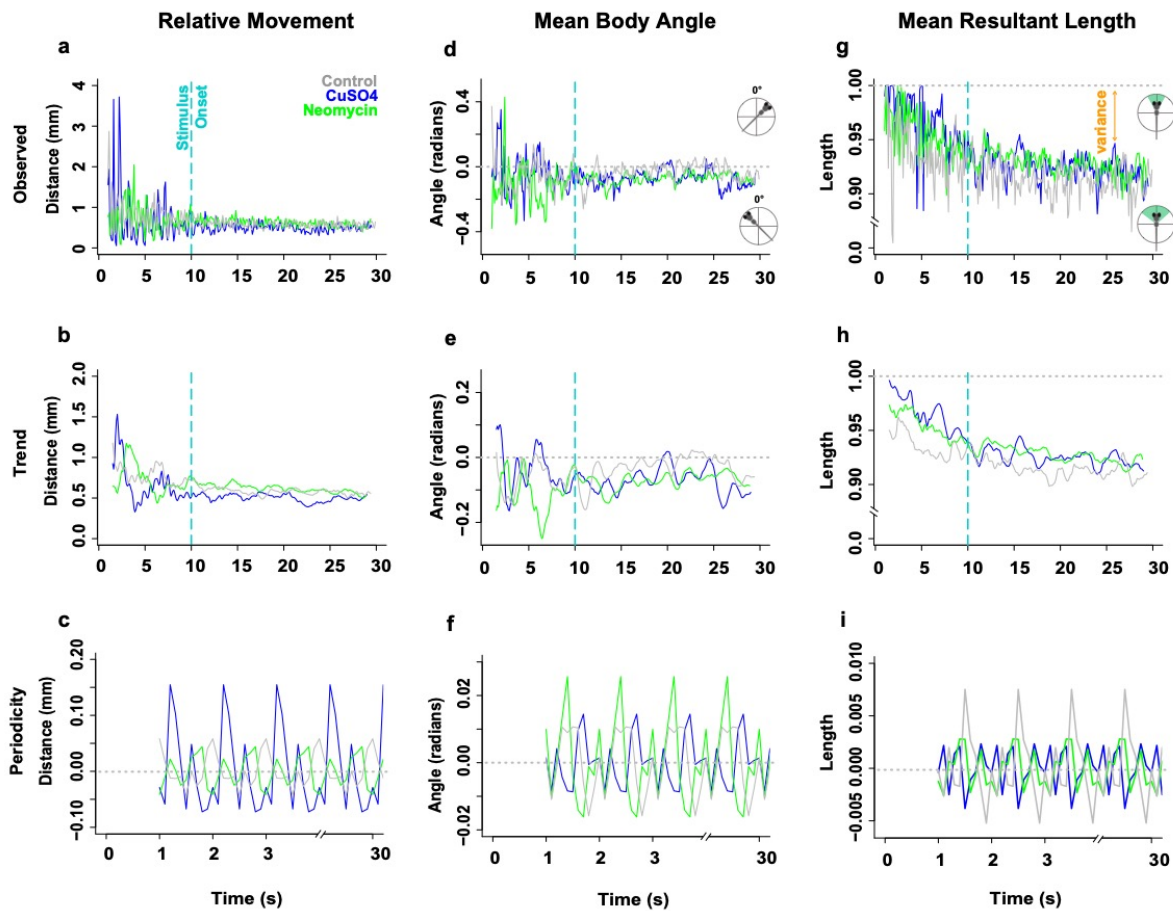

293

294 **Figure 8. The overall trends and periodic fluctuations in the linear (relative distance moved) and angular (mean body angle,**  
 295 **mean length of the resultant vector) motion parameters of rheotaxis behavior differ among treatment groups.** (Note: the  
 296 relative velocity and acceleration periodicity data mimicked the patterns observed in relative movement; see Supplementary Fig. 3).  
 297 Gray = control, blue = CuSO<sub>4</sub>, green = neomycin. Spectral decomposition of the observed data (a, d, g) removed the noise  
 298 (Supplementary Fig. 3g, h, i) to reveal the overall underlying trends (b, e, h) and the periodicity, or recurring fluctuations (c, f, i) that  
 299 occurred during any given 1 s of the experiment. The periodicity waveform peaks (c, f, i) indicate the average amount (amplitude),  
 300 number, direction (positive = increasing; negative = decreasing), and order of occurrence for these cyclic fluctuations as a function  
 301 of unit time (1 s). The overall trends were that CuSO<sub>4</sub> treated fish had the least relative movement (b), while the control fish more  
 302 rapidly oriented to 0° (e) and swam with more angular variance (h; 1 – mean length of the resultant vector) compared to lesioned  
 303 fish. The periodic fluctuation in relative distance moved (c) was greatest in CuSO<sub>4</sub> treated fish compared to control or neomycin  
 304 treated fish. However, the fluctuation in mean body angle (f) was greatest in neomycin treated fish compared to control and CuSO<sub>4</sub>  
 305 fish, while the fluctuation in mean length of the resultant vector (i.e the angular variance; i) was greatest in control fish compared to  
 306 lesioned fish.

307

308 During rheotaxis, the trend among groups was that CuSO<sub>4</sub> ablation reduced the  
 309 magnitude of relative movement (Fig. 8b) but not the relative velocity or acceleration of fish  
 310 (Supplementary Fig. 3 c, f) compared to control and neomycin groups. For the trends in angular



311 movements, CuSO<sub>4</sub>- and neomycin-treated fish showed a reduced ability to achieve and  
312 maintain orientation with flow compared to controls (Fig. 8e). Lesioned fish had longer mean  
313 resultant vector lengths and greater fidelity to a mean body angle compared to controls (Fig. 8h)  
314 which swam with more angular variance ( $1 - rho$ ) than lesioned fish. Consequently, an intact  
315 lateral line allowed control fish to detect minute changes in water flow and make regular course  
316 corrections of small magnitude, thereby increasing their angular variance (Fig. 8h) and enabling  
317 them to rapidly orient into flow with greater accuracy (Fig. 8e) and led to a greater proportion of  
318 non-lesioned fish performing rheotaxis compared to lesioned fish (Fig. 7).

319         Among treatment groups, there were clear differences in the periodicity of the changes  
320 in the magnitude of linear (Fig. 8c; Supplementary Fig. 3 c, f) and angular (Fig. 8f, i)  
321 movements. The linear periodicity data showed that CuSO<sub>4</sub>-treated fish had the greatest  
322 fluctuation in the magnitude of their relative distance moved, velocity, and acceleration  
323 compared to the control and neomycin-treated fish (Fig. 8c; Supplementary Fig. 3 c, f;  
324 Supplementary Table 9). Conversely, the neomycin-treated fish had the lowest fluctuations in  
325 the magnitude of their linear movements. The large magnitude of the periodic oscillations in  
326 CuSO<sub>4</sub>-treated fish could compensate for their delayed response to flow (Fig. 4d), reduced trend  
327 in relative movement (Fig. 8b), and explain the relative increase observed in total distance  
328 traveled during flow (Fig. 4c). Furthermore, CuSO<sub>4</sub>-treated fish had large amplitude peaks that  
329 occurred early during the random sampling periods, whereas neomycin-treated and control fish  
330 had smaller peaks that increased gradually (Fig. 8c; Supplementary Fig. 3 c, f). These empirical  
331 data support the qualitative observations that CuSO<sub>4</sub> ablation resulted in fish that performed  
332 rheotaxis with delayed responses and erratic movements. Additionally, the maxima in control  
333 fish occurred at the end of the sampling period (Fig. 8c), indicating an intact lateral line allowed  
334 fish to exhibit a graded and more controlled response to flow compared to lesioned fish.

335         The range in amplitude of the angular periodicity data showed a different pattern where  
336 neomycin-treated fish had the greatest fluctuation in mean body angle, followed by the controls,

337 and then the CuSO<sub>4</sub>-treated fish (Fig. 8f; Supplementary Table 9). Notably, all three treatment  
338 groups had a small dip and correction during the initial portion of the sampling period (Fig. 8f),  
339 which indicates that all fish had the same initial small change in mean body angle to the left of  
340 the flow. Control and CuSO<sub>4</sub>-treated fish had a subsequent series of minor heading changes to  
341 the right (positive values) and left (negative values) of the flow, whereas the neomycin-treated  
342 fish regularly overshoot their initial and secondary responses before recovering. These large  
343 oscillations might explain why neomycin fish had difficulty locking onto the source of the water  
344 flow (Fig. 8e). However, the smaller fluctuations in mean body angle observed in control and  
345 CuSO<sub>4</sub>-treated fish (Fig. 8f) is not sufficient to explain why control fish could rapidly and  
346 consistently orient toward the flow better than CuSO<sub>4</sub>-treated fish (Fig. 8e). Perhaps the greater  
347 variety of temporal fluctuation combined with the small amplitude fluctuations allowed intact fish  
348 to more rapidly attune their mean body angle to the flow compared to CuSO<sub>4</sub> fish (Fig. 9d; see  
349 *Spectral Analysis*). In both neomycin- and CuSO<sub>4</sub>-lesioned fish, the waveform structure for the  
350 mean resultant length per second shows a rapid succession of several small peaks, but that of  
351 control fish has two small peaks followed by two large peaks (Fig. 8i). These small initial  
352 changes in angular variance of intact fish might reflect greater capacity to sample flow stimuli  
353 from a variety of small angles to produce large correctional changes in angular variance (Fig. 8i)  
354 with better efficacy (Fig. 8e).

355

356 *Spectral Analysis Reveals that Lateral Line Ablation Impacts the Temporal Fluctuation of Linear*  
357 *and Angular Movement*

358 The fluctuations in periodicity data have a predictable and repeatable temporal structure  
359 that can be described by a series of fundamental sine and cosine functions that oscillate at  
360 different frequencies (Hz; cycles s<sup>-1</sup>) and periods (s cycle<sup>-1</sup>). Therefore, we performed a spectral  
361 analysis to decompose the periodicity data (Fig. 8c, f, i; Supplementary Fig. 3 c, f) and  
362 determine the fundamental frequencies at which the fluctuations in linear and angular

363 movement occurred (Fig. 9a-e). For the power spectra of each parameter, the frequency and  
364 amplitude of three most dominant peaks were summed to calculate the net shifts in frequency  
365 and power among treatment groups (Supplementary Table 10).

366           Relative to controls, the overall trend in lesioned fish was a net downshift in the  
367 dominant frequencies of relative movement, velocity, and acceleration, a net upshift in the mean  
368 body angle, and a net increase in amplitude across these four parameters (Fig. 9a-d,  
369 Supplementary Table 10). This indicates that lateral line-ablated fish swam with less frequent  
370 changes in their linear movements, more frequent changes in their mean body angle, and  
371 greater numbers of movements at these frequencies relative to controls. The curves for mean  
372 resultant vector length showed a notable difference between the two ablation treatments where  
373 CuSO<sub>4</sub>-treated fish had a net frequency downshift and a net amplitude increase relative to  
374 controls (Fig. 9e, Supplementary Table 10), and vice versa for neomycin-treated fish (Fig. 9e,  
375 Supplementary Table 10). Therefore, CuSO<sub>4</sub>-lesioned fish swam with more low frequency  
376 changes in angular variance, while neomycin-lesioned fish swam with fewer high frequency  
377 changes in angular variance.

378

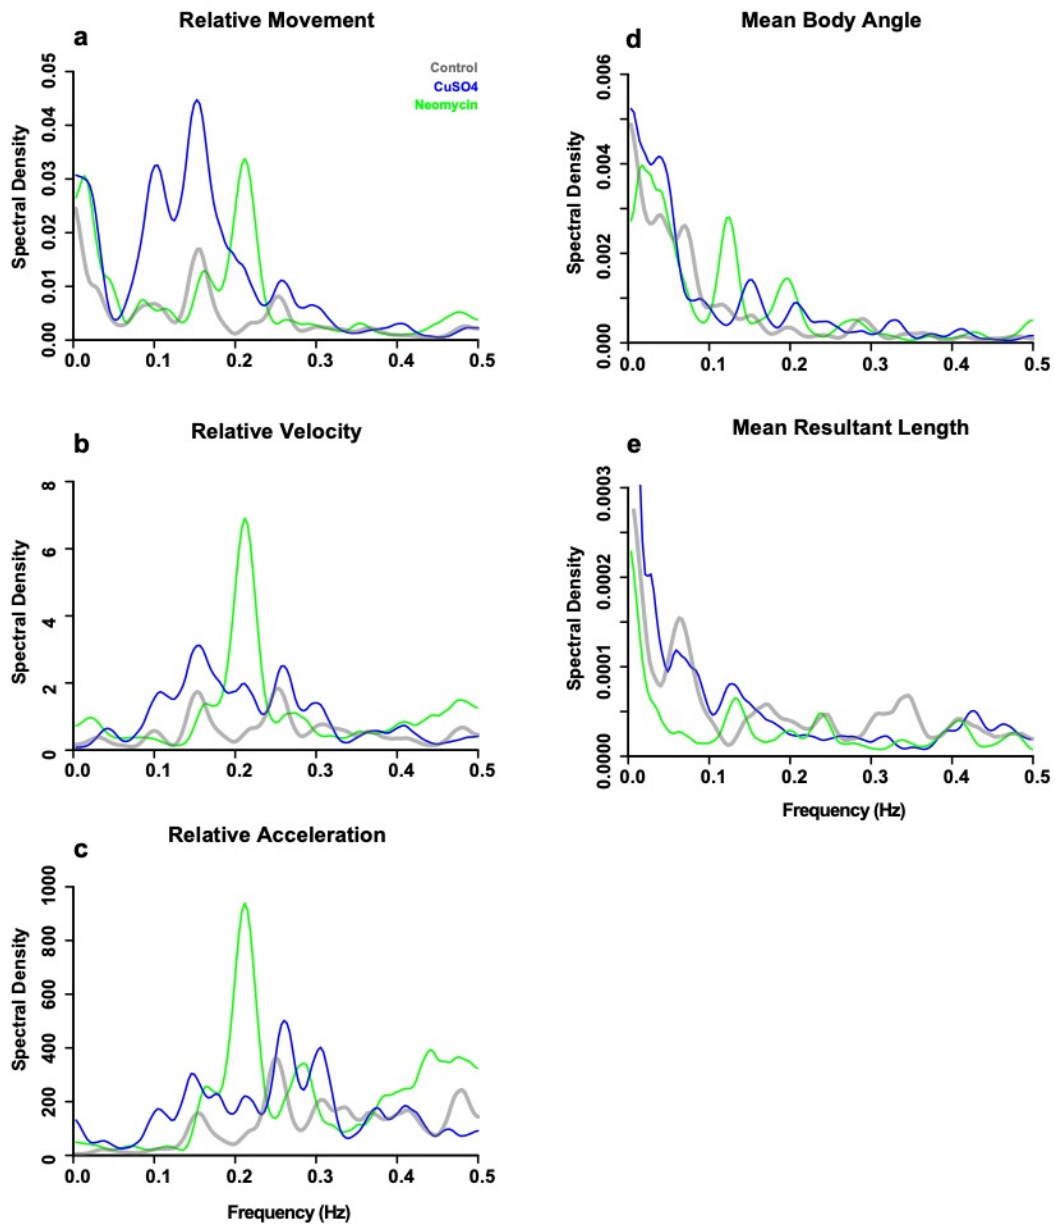

379

380 **Figure 9. Power spectra density curves show that an intact lateral line allowed fish to make fewer yet more temporally**  
381 **variable changes in relative linear and angular movement.** Because frequency and period are inversely related, the low  
382 low frequency peaks to left of the periodograms indicate cycles with longer periods, and vice versa The amplitude of the peaks indicates  
383 the spectral density, or the number of movement events at a given frequency that occurred during the experiment. The peaks with  
384 the greatest amplitude indicate the fundamental or dominant frequencies of fluctuation in the periodicity data. The frequency and  
385 amplitude of three most dominant peaks were summed to calculate the net shifts in frequency and power. Relative to controls  
386 (gray), lesioned (blue = CuSO<sub>4</sub>, green = neomycin) fish had a net downshift in the three dominant frequencies of (a) relative  
387 movement, (b) velocity, and (c) acceleration and a net upshift in (d) mean body angle of larval zebrafish during rheotaxis. For the  
388 dominant frequencies of (e) mean resultant length, there was a net downshift and upshift for CuSO<sub>4</sub>- and neomycin-treated fish,  
389 respectively. Furthermore, relative to lateral line intact fish, the peaks of lesioned fish are clustered into fewer peaks of greater

390 amplitude over a relatively narrow range, which indicates that lateral line ablation increased the number yet reduced the temporal  
391 variation of changes in movement.

392

393           Compared to neomycin-treated fish, the power spectra of the linear movements in  
394 control and CuSO<sub>4</sub>-treated fish (Fig. 9a-c) show broad clusters of dominant peaks that gradually  
395 upshift with each subsequent time derivative. CuSO<sub>4</sub>-treated fish swam with the greatest  
396 number of low-frequency fluctuations in relative movement, but the fluctuations in their velocity  
397 and acceleration had greater temporal variety and occurred with increasing frequency in a  
398 manner similar to those of control fish. Interestingly, the curves for linear movement in  
399 neomycin-treated fish are dominated by a single peak at the primary frequency of 0.21 Hz that  
400 remained constant with each time derivative (Fig. 9a-c). Therefore, neomycin ablation reduced  
401 the temporal variation of the cyclic fluctuations in relative movement, velocity, and acceleration  
402 of fish during rheotaxis. This clustering of rheotaxis behaviors into fewer peak responses with  
403 discrete timing, or temporal contraction, was further seen in the angular power spectra of  
404 lesioned fish. For example, the power spectrum of the mean body angle in control fish is  
405 relatively flat with small peaks, whereas those of ablated fish are focused into distinct dominant  
406 frequencies with larger amplitudes (Fig. 9d; also see Fig. 8f). Likewise, the spectrum of the  
407 mean resultant length in controls shows five broadly spaced peaks, but those of the lesioned  
408 fish are clustered into fewer peaks focused at the dominant frequencies (Fig. 9e). Therefore,  
409 intact fish swam with fewer overall changes to their mean body angle, but their angular variance  
410 had greater temporal variety (Fig. 9e) and magnitude (Fig. 8h, i) compared to lesioned fish.

411           We interpret the relatively flat and generally lower peaks observed in the power spectra  
412 of control fish (Fig. 9a-d) as indicating that sensory data from the lateral line allowed fish to  
413 make fewer changes in linear and angular movement over a broader range of frequencies, thus  
414 increasing the efficiency and efficacy of their response to flow. Conversely, fewer peaks of  
415 greater amplitude observed in lesioned fish indicate that loss of mechanosensory input from the

416 lateral line resulted in greater numbers of swimming adjustments that were temporally restricted,  
417 reducing their economy of movement within flow.

418

### 419 *Cross Correlation Between Linear and Angular Movements Shows Distinct Rheotaxis Profiles* 420 *Among Groups*

421 Changes in linear movement may be temporally cross-correlated with changes in  
422 angular movement, depicting rapid turns in response to flow. As these movements receive input  
423 from the lateral line, we investigated the effect of toxins on cross correlation between linear and  
424 angular movements. The correlograms depict how an above average increase in relative  
425 movement (Fig. 10a-b), velocity (Fig. 10c-d), or acceleration (Fig. 10e-f) cross-correlates with  
426 above average changes in the mean body angle (Fig. 10a, c, e) or mean resultant length (Fig.  
427 10b, d, f).

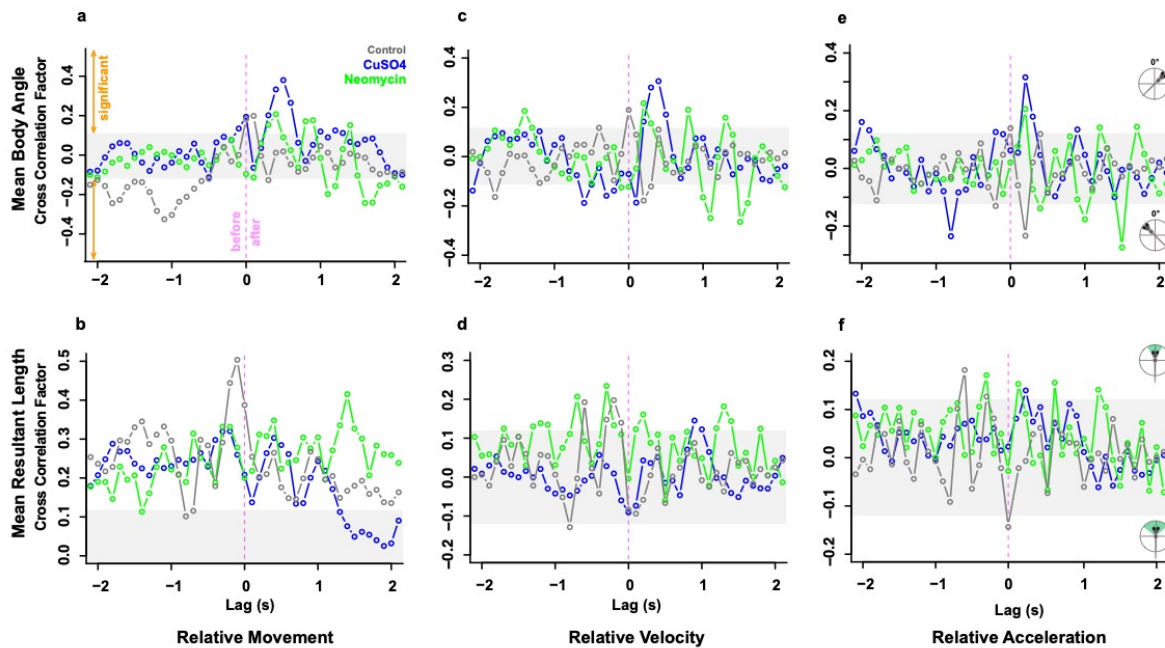

428

429 **Figure 10. Cross correlations between linear and angular movement data indicate toxin-specific changes to the rheotaxis**  
430 **behavioral profile of fish.** The correlograms depict how an above average increase in relative movement (a, b), relative velocity (c,  
431 d), or relative acceleration (e, f) were significantly cross-correlated with above average increases or decreases in the mean body  
432 angle (a, c, e) or mean resultant length (b, d, f). In the figures for mean body angle (a, c, e), the positive and negative peaks indicate  
433 that fish were oriented to the right or left of the oncoming flow vector, respectively. In the figures for mean resultant length (b, d, f),

434 the positive and negative peaks indicate fish that had a lesser or greater variance of the mean body angle, respectively. The X-axis  
435 indicates the relative timing, or lag, of the cross correlation between the angular parameter with respect to an above average  
436 increase in the linear parameter (zero = simultaneous occurrence; negative = angular change occurs *before* linear change; and  
437 positive = angular change occurs *after* linear change). *For example, interpret panel 10a as:* In control (gray) fish, above average  
438 increases in relative movement are significantly correlated with changes in mean body angle to the left of the flow vector that  
439 previously occurred. In CuSO<sub>4</sub>-treated (blue) fish, above average increases in relative movement are significantly correlated with  
440 above average changes in mean body angle that subsequently occurred. In neomycin-treated (green) fish, above average increases  
441 in relative movement are significantly correlated with below average changes in mean body angle that subsequently occurred.  
442

443 Focusing on the strongest cross-correlations (Fig. 10; Supplementary Table 11) shows  
444 three distinct patterns in the direction and relative timing of changes between mean body angle  
445 and linear movements (Fig. 10a, c, e) and between temporal changes in angular variance and  
446 linear movements (Fig. 10b, d, f). In controls, the changes in body angle direction and the timing  
447 between angular and linear movements were temporally cross correlated, producing smooth re-  
448 orienting movements characteristic of effective station holding during rheotaxis (Fig. 10a, c, e).  
449 In addition, control fish tended to *reduce* their angular variance *prior* to a large change in  
450 movement (Fig. 10b), velocity (Fig. 10d), or acceleration (Fig. 10f). Therefore, the relative timing  
451 and direction of changes in mean body angle in lateral line-intact fish depended upon the time  
452 derivative of the linear movement, but the relative timing between reduced angular variance was  
453 consistent across changes in all linear movements.

454 In lesioned fish, the timing and direction of the strongest cross-correlations shifted the  
455 rheotaxis profile of these fish in a predictable, consistent, and treatment-specific manner. CuSO<sub>4</sub>  
456 fish tended to change their mean body angle to the *right* of the oncoming flow vector *after* large  
457 changes in movement (Fig. 10a), velocity (Fig. 10c), and acceleration (Fig. 10e). However,  
458 neomycin fish tended to change their body angle to the *left* of the flow *after* changes in  
459 movement (Fig. 10a), velocity (Fig. 10c), and acceleration (Fig. 10e). As in controls, lesioned  
460 fish always *reduced* their angular variance when changing their linear movements, but the  
461 relative timing of the cross-correlation shifted according to the toxin used and the time derivative  
462 of the linear movement. In CuSO<sub>4</sub>-treated fish, the strongest correlation between a *reduction* in

463 angular variance tended to occur *prior* to changes in movement (Fig. 10b), *after* changes in  
464 velocity (Fig. 10d), and *after* changes in acceleration (Fig. 10f). Conversely, in neomycin-treated  
465 fish, *reductions* in angular variance occurred *after* changes in movement (Fig. 10b), *before*  
466 changes in velocity (Fig. 10d), and *before* changes in acceleration (Fig. 10f).

467         These data revealed that control fish with intact lateral line detected oncoming flow and  
468 adjusted their mean body angle *prior* to making a change in their relative movement, while  
469 lateral-line lesioned fish changed their mean body angle *after* a change in their relative  
470 movement. We posit that an intact lateral line allowed fish to rapidly detect flow and adjust their  
471 heading prior to swimming into the flow while, in the absence of visual and lateral line cues,  
472 lesioned fish had to rely on tactile cues, such as physical displacement along the substrate, to  
473 gain an external frame of reference necessary to orient and swim into flow. Intact fish also  
474 tended to change their body angle to the left of the flow vector, which might reflect lateral line  
475 handedness where larval zebrafish prefer to use the right side of their lateral line to detect flow  
476 stimuli in a manner similar to that of blind cavefish<sup>(39)</sup>. This undoubtedly shifted the relative  
477 timing of the cross-correlations between angular and linear movement, perhaps impaired any  
478 potential lateral line handedness, and further contributed to the erratic rheotaxis behavior  
479 observed in these fish.

480         In summary, lateral line ablation of larval zebrafish resulted in distinct, treatment-specific  
481 rheotaxis profiles that differed from that of intact fish in the following ways: 1) delayed relative  
482 timing between changes in mean body angle and all linear movements, 2) changed mean body  
483 angle in response to flow, and 3) shifted timing between reductions in angular variance and  
484 changes in linear movement.

485

## 486 **CONCLUSIONS**

487         In this study, ablating the lateral line of larval zebrafish with two commonly used toxins  
488 impacted their ability to produce the fine adjustments required to station hold in response to



489 water flow. Lateral line ablation inhibited the ability of fish to discriminate subtle distinctions in  
490 flow, resulting in more intense overcorrections and decreased economy of motion. Our data  
491 support the hypotheses that the lateral line mediates station holding behavior (<sup>2</sup>, <sup>33</sup>, <sup>38</sup>), but is not  
492 required for rheotaxis behavior (<sup>2</sup>, <sup>11</sup>, <sup>12</sup>, <sup>29</sup>, <sup>30</sup>) in larval zebrafish in non-uniform laminar flow. We  
493 posit that the physical displacement of lesioned fish along the substrate provided sufficient  
494 tactile cues (<sup>8</sup>, <sup>10</sup>) necessary for lateral line ablated fish to perform rheotaxis.

495 We propose that the greater angular variance observed in intact fish might indicate that  
496 these fish were regularly sampling the velocity gradients of the flow stimuli (<sup>22</sup>) from a variety of  
497 body angles so that they could reduce their response latency, quickly orient with respect to  
498 fluctuating flow stimuli, and maintain their overall mean body angle with greater fidelity to the  
499 flow vector than lesioned fish. During flow, intact fish had recurring fluctuations in relative  
500 movement, velocity, and mean body of lower magnitude, and fluctuations in relative movement,  
501 velocity, acceleration, and mean body angle of controls that were fewer in number yet occurred  
502 over a wider range of temporal frequencies compared to lesioned fish. Thus, the sensory cues  
503 detected by the lateral line allowed control fish to respond to water flow with less intensity and  
504 greater temporal variation in their movements, resulting in greater economy of movement.

505 This is the first study to demonstrate that two toxins commonly used to ablate the lateral  
506 line impacts the behavioral profiles and mechanism of rheotaxis in zebrafish. We propose a  
507 novel functional assay for hair cell ototoxicity, which may be used to supplement future studies  
508 exploring lateral line injury, protection, and recovery. Furthermore, the simplicity of the  
509 equipment and precision of the machine learning analyses used in this assay make it amenable  
510 to adaptation for detecting subtle behavioral changes in a wide variety of animal models.

511

## 512 **METHODS**

513 *Ethics Statement*

514 This study was performed with the approval of the Institutional Animal Care and Use  
515 Committee of Washington University School of Medicine in St. Louis and in accordance with  
516 NIH guidelines for use of zebrafish.

517

### 518 *Zebrafish*

519 Adult zebrafish were raised under standard conditions at 27-29°C in the Washington  
520 University Zebrafish Facility. The wild type line AB\* was used for all experiments unless  
521 otherwise stated. Embryos were raised in incubators at 28°C in E3 media (5 mM NaCl, 0.17 mM  
522 KCl, 0.33 mM CaCl<sub>2</sub>, 0.33 mM MgCl<sub>2</sub>; <sup>(40)</sup>) with a 14:10 hr light:dark cycle. After 4 days post  
523 fertilization (dpf), larvae were raised in 100-200 mL E3 media in 250-mL plastic beakers and fed  
524 rotifers daily. Sex of the animal was not considered in our study because it cannot be  
525 determined in larval zebrafish.

526

### 527 *Lateral Line Ablation*

528 At 6 or 7dpf, ~15 larval zebrafish were placed into each well of a flat bottom 6-well  
529 polystyrene plate (#351146, Falcon) in 8 mL of E3 media. Treatment animals were placed into  
530 50 µM neomycin trisulfate salt hydrate (N1876-25G, Sigma Aldrich) or 10 µM CuSO<sub>4</sub> (451657-  
531 10G, Sigma Aldrich) solutions made in 8 mL of E3 media. The plate was placed into an  
532 incubator at 29°C and exposed to the treatment for 30 min (neomycin) or 60 min (CuSO<sub>4</sub>). After  
533 exposure, the fish were removed from treatment, rinsed 3X in media, then placed into 8 mL of  
534 clean media and allowed to recover for 120 min (CuSO<sub>4</sub>) or 150 min (neomycin) in the  
535 incubator. Recovery times for CuSO<sub>4</sub> and neomycin were chosen to standardize the total time of  
536 treatment and recovery to 180 min. Control fish (n = 248) received no chemical treatments yet  
537 underwent the same procedures as the CuSO<sub>4</sub> (n = 204) and neomycin (n = 222) fish. At the

538 end of treatment, the larvae were removed from the incubator and immediately began rheotaxis  
539 behavior trials.

540

#### 541 *Immunohistochemistry*

542 Lateral line ablation was confirmed via immunohistochemistry on a subset of control and  
543 lesioned fish. Larvae were sedated on ice (5 min, 0°C) then fixed overnight at 4°C in PO<sub>4</sub> buffer  
544 with 4% paraformaldehyde, 4% sucrose, and 0.2 mM CaCl<sub>2</sub>. Larvae were rinsed 3X with PBS  
545 and blocked for 2 hr at room temperature in PBS buffer with 5% horse serum, 1% Triton-X, and  
546 1% DMSO. Primary antibodies for Otoferlin (HCS-1, Developmental Studies Hybridoma Bank,  
547 mouse IgG2a, 1:500) were diluted in 1x PBS buffer with 2% horse serum and 0.1% Triton-X,  
548 then incubated with the larvae overnight at 4°C with rotation. Larvae were rinsed 5X with PBS  
549 solution, then placed in secondary antibody (ThermoFisher, goat anti-mouse IgG2a, Alexa 488,  
550 1:1000) diluted in PBS with 2% horse serum and incubated for 2 hr at 22°C with rotation. Fish  
551 were rinsed 3X with PBS then incubated with DAPI (Invitrogen, 1:2000) in PBS for 20 min at  
552 22°C to label cell nuclei. Larvae were rinsed 2X with PBS then mounted onto glass slides with  
553 elvanol (13% w/v polyvinyl alcohol, 33% w/v glycerol, 1% w/v DABCO (1,4 diazobicyclo[2,2,2]  
554 octane) in 0.2 M Tris, pH 8.5) and #1.5 cover slips.

555

#### 556 *Confocal Imaging and Processing*

557 Immunolabeled z-stack images were acquired via an ORCA-Flash 4.0 V3 camera  
558 (Hamamatsu) using a Leica DM6 Fixed Stage microscope with an X-Light V2TP spinning disc  
559 confocal (60 µm pinholes) controlled by Metamorph software. The region of interest tool in  
560 Metamorph was used to select specific neuromasts (~700 x 700 px) from the surrounding area.  
561 Z-stack images of 100 ms exposure were acquired through with a 10X/0.3 N.A. dry lens in 2 µm  
562 slices or through a 63X/1.4 N.A. oil immersion lens 0.5 µm slices. Excitation for DAPI (405 nm)

563 and Alexa 488 GFP was provided by 89 North LDI-7 Laser Diode Illuminator on the lowest  
564 power setting (20%) that could acquire images and minimize photobleaching. Confocal images  
565 were processed in FIJI (ImageJ, NIH) software to create maximal z-stack maximal projection  
566 composite images with minor exposure and contrast adjustments. Composite images were  
567 stitched together in Adobe Photoshop CC.

568

### 569 *Experimental Apparatus for Rheotaxis Behavior*

570 A microflume (220 x 100 x 40 mm; Fig. 1a) was constructed in two pieces from clear  
571 resin (RS-F2-GPCL-04, Formlabs) using a high-resolution 3D printer (Form 2, Formlabs) and  
572 joined with two-stage epoxy. A 1 mm-thick top layer of plastic was cemented with silicone  
573 sealant downstream of the flume pump (Fig. 1a) to prevent water spillage out of the apparatus.  
574 The low-pressure portion of the flume away from the flume pump remained open at the top to  
575 facilitate the addition and removal of water and fish when necessary. A square (30 x 30 x 10  
576 mm) arena was 3D printed from clear resin and 25  $\mu\text{m}$  mesh was cemented with epoxy on to  
577 the open upstream and downstream sides, allowing water to flow through the working section.  
578 The arena served to isolate larval fish at a specific location within the flume, enabling reliable  
579 video recording. A 6V bow thruster motor (108-01, Raboesch) was inserted into the flume (Fig.  
580 1b) and used to pump water through the flume at a constant velocity. The water pump was  
581 connected to a 7.2 V power supply and the flow rate was modulated by an inline rheostat. An  
582 Arduino (UNO R3, Osepp) with a digital display using custom scripts was used to control and  
583 monitor the onset and duration of water flow in a consistent manner.

584 Rheotaxis is a multimodal behavior that is mediated by the visual, vestibular,  
585 mechanotactile, and lateral line systems. It was not possible to selectively block the detection of  
586 tactile cues in a non-invasive manner. However, evidence suggests that the angular motion in  
587 the horizontal plane (i.e. yaw) is not detectible in larval zebrafish at 6-7dpf (<sup>31, 32</sup>), and we

588 reduced linear acceleration cues to the vestibular system by using a flow stimulus of that rapidly  
589 accelerated ( $< 250$  ms) to a constant maximum velocity ( $V = 9.74$  mm s<sup>-1</sup>). We further isolated  
590 the contribution of the lateral line to rheotaxis by performing the rheotaxis assay under infrared  
591 light to eliminate visual cues (Fig. 1a). The flume was placed onto a diffused lighting array of  
592 196 LEDs that emitted infrared (IR) light at 850 nm upward through the translucent flume (Fig.  
593 1b). A monochromatic high speed camera (SC1, Edgertronic.com) without an IR filter was  
594 placed on a weighted tripod directly over the flume to record behavioral trials at the following  
595 settings for optimal speed of data acquisition and machine learning analyses: either 200 or 60  
596 frames s<sup>-1</sup> (fps), ISO 20,000, and 1/1000 s shutter speed. The 60 mm Nikon macro lens was  
597 manually set to an aperture of *f*16 to ensure adequate depth of field. The live video feed was  
598 monitored on the PC and video recordings were remotely triggered by the Arduino. Videos of  
599 each trial were recorded onto 64 GB SD cards for subsequent archiving in duplicate onto a 10  
600 TB RAID array (Mercury Elite Pro Dock, OWC).

601

#### 602 *Rheotaxis Behavior Pre-trial Preparation*

603 The camera was connected to the local area network (LAN) and initialized according to  
604 the manufacturer procedure ([http://wiki.edgertronic.com/index.php/Quick\\_start\\_guide](http://wiki.edgertronic.com/index.php/Quick_start_guide)). A layer  
605 of light diffusing material (several Kimwipes© in a sealed plastic sheath) was placed on top of  
606 the IR light array. The flume was placed on the diffusion material and filled with E3 media (28°C)  
607 and the arena was then placed within the flume. The camera height over the flume was  
608 determined by the maximum image size of the arena within the video frame that allowed a ~10-  
609 20 pixel border for subsequent cropping during video pre-processing. Because IR light is a  
610 significant source of heat, a thermometer was placed into the open portion of the flume and mini  
611 frozen ice packs (2 x 2 cm; -20°C) were used to maintain a consistent temperature range of 27-  
612 29°C.

613

#### 614 *Rheotaxis Trials*

615 Under IR illumination, a single larval zebrafish was transferred by pipette from the 6-well  
616 plate to the arena in the flume. The swimming activity of the fish was monitored for ~10 s to  
617 ensure that it exhibited the burst-and-glide behavior indicative of normal larval zebrafish  
618 swimming (<sup>41</sup>). The Arduino was activated, and the trial began by recording 10 s of baseline  
619 swimming behavior on video. After 10 s had elapsed, the flume pump was automatically  
620 activated for 20 s and delivered a constant mean ( $\pm$  SD) water flow stimulus of  $9.74 \pm 1.43$  mm  
621  $s^{-1}$  (approximately 2 larval fish body lengths  $s^{-1}$ ) while the camera continued to record swimming  
622 behavior. After a total of 30 s (no flow = 0-10 s; initial flow = 10-20 s; and final flow = 20-30 s)  
623 had elapsed, the pump turned off, the camera stopped recording, the file was saved to the SD  
624 card, and the larvae was removed from the arena. Cohorts of five individual fish from each  
625 group (control, neomycin, or  $CuSO_4$ ) were tested before switching to a new group of fish. After  
626 five fish from each group had been tested, the process was repeated for up to four cohorts for  
627 the entire experiment.

628

#### 629 *3D Markerless Pose Estimation (DeepLabCut)*

630 *Equipment:* We used a computer dedicated to behavioral data acquisition and analysis  
631 that was based on a Dell Precision 3630 workstation with the following specifications: Windows  
632 10 operating systems, Intel Xeon E-2246G processor, 64 GB RAM, multiple 2TB SSD hard  
633 drives, EVGA GFORCE RTX 2080Ti video card, dual 24" 4K monitors, Dell Thunderbolt 3 PCIe  
634 Card, OWC Mercury Elite Pro Dock (TB3RSDK24T) - 24TB Thunderbolt 3 Dock and Dual-Drive  
635 RAID configured as 12TB RAID 1.

636 *Installation:* Our GPU equipment required the installation of Tensorflow 1.12 with the  
637 NVIDIA CUDA package prior to installing multi-animal DeepLabCut2.2b8 (maDLC; <sup>42</sup>Mathis et  
638 al. 2018, <sup>43</sup>Nath et al. 2019), Python 3.6, and all dependencies in an Anaconda virtual

639 environment according to  
640 (<https://github.com/DeepLabCut/DeepLabCut/blob/master/docs/installation.md>).

641 Detailed tutorials for using maDLC with a single animal are available online  
642 ([https://github.com/DeepLabCut/DeepLabCut/blob/master/docs/maDLC\\_AdvUserGuide.md](https://github.com/DeepLabCut/DeepLabCut/blob/master/docs/maDLC_AdvUserGuide.md),  
643 [https://www.youtube.com/channel/UC2HEbWpC\\_1v6i9RnDMY-dfA](https://www.youtube.com/channel/UC2HEbWpC_1v6i9RnDMY-dfA)); however, the pertinent  
644 details of our procedure are as follows.

645 *Dataset Curation:* To reduce computational load, all video files were pre-processed by  
646 down-sampling to 1000 x 1000 px then cropping out dead pixels (i.e. black spots) on the camera  
647 sensor and extraneous portions of the video by using the video editor function of maDLC.

648 *Project Creation:* A new single animal maDLC project was created and the project  
649 config.yaml file was modified to include seven unique body parts that were easily identifiable on  
650 a larval zebrafish (left\_eye, right\_eye, swim\_bladder, tail\_1 (near the base), tail\_2, tail\_3, tail\_4  
651 (tail tip), Fig. 1a). The skeleton was initially created by forming individual connections between  
652 the seven body parts in the config.yaml file. We then extracted 20 frames per video from a  
653 curated set of ten videos that contained representative examples of the target behaviors and  
654 experimental treatments. The seven body parts were labeled on the fish in each frame using the  
655 graphical user interface (GUI). The annotated frames were checked for accuracy and multiple  
656 additional skeletal connections between the seven body parts were added using the skeleton  
657 builder GUI pop up window, helping maDLC learn faster and create accurate models.

658 *Pose Estimation:* The training dataset was created using cropped images (400 x 400 px)  
659 to reduce computational loading and the default setting of Resnet-50 pre-trained network  
660 weights, and imgaug data augmentation. We set the display iterations to 100, save iterations to  
661 1000, and trained the network until the all of the loss parameters plateaued at 100,000  
662 iterations. The network was evaluated (PCK values close to 1, RMSE values low) and cross-  
663 validated using the default parameters.

664           *Identity Tracking:* Curated videos were analyzed and the detections (pickle files) were  
665 assembled into tracklets (h5 files) using the box method, providing superior results for these  
666 data compared to the skeleton method  
667 ([https://github.com/DeepLabCut/DeepLabCut/blob/master/docs/maDLC\\_UserGuide.md](https://github.com/DeepLabCut/DeepLabCut/blob/master/docs/maDLC_UserGuide.md)). The  
668 interactive tracklet GUI was launched and the original videos with the newly created labeled  
669 body parts were used to correct for outliers in the tracklet data files. Jitter and wholesale  
670 misidentification of the body part data were changed and saved.

671           *Post Processing:* The results were plotted for each video and a new labeled video was  
672 created using the original curated videos and the refined tracklet data. The labeled output  
673 videos were checked for labeling accuracy and there was no need to extract additional frames  
674 to augment the data set. Novel videos were batch processed beginning at the video analysis  
675 step and ending with the plot trajectories and label videos step. Once several videos of different  
676 conditions and behavioral responses could be accurately labeled, the create labeled videos step  
677 was omitted to reduce computational load, increase analysis productivity, and reduce hard drive  
678 space storage requirements.

679

## 680 *Supervised Behavioral Annotation, Classification, & Analysis (SimBA)*

681           *Definition of Rheotaxis Behavior:* We defined positive rheotaxis as when the larvae  
682 swam into the oncoming water flow at an angle of  $0^\circ \pm 45^\circ$  for at least 100 ms. The movement  
683 component was used to distinguish active swimming behavior from passive drift in cases where  
684 larvae would orient into the flow, stop swimming, and drift backward without rotating in the X-Y  
685 plane.

686           *Installation:* SimBAxTF-development version 68 (<sup>44</sup>Nilsson et al. 2020), Python 3.6, Git,  
687 FFmpeg, and all necessary dependencies were installed in a separate Anaconda virtual  
688 environment: (<https://github.com/sgoldenlab/simba/blob/master/docs/installation.md>).



689           *Dataset Curation:* The pre-processed video files used in maDLC analysis were  
690 converted to the AVI format using the video editor function of SimBA.

691           *Build Classifiers*

692           *Project Creation:* A new SimBA project was created according to Scenario 1 as shown  
693 here: <https://github.com/sgoldenlab/simba/blob/master/docs/Scenario1.md>. Before the project  
694 config file was generated, we selected the user defined pose configuration option and the DLC-  
695 multi animal options. The user-defined pose configuration nomenclature must match the body  
696 parts and individual animal labels used in the maDLC config file. Next, several curated videos of  
697 fish from different treatments that displayed ideal examples of rheotaxis were imported into the  
698 project folder. Then the h5 files (final tracklet data) generated by DLC for these videos were  
699 imported. Last, the frames of each video were extracted into the project.

700           *Load Project:* The project was loaded into SimBA and the video parameters were set for  
701 each of the curated videos. We made certain to set the correct frame rate (fps), resolution, and  
702 pixel measurements (px/mm), as these settings affected downstream analyses. Outlier  
703 correction was achieved by selecting two body parts that were reliably labeled by DLC but not  
704 too close together on the animal (e.g. swim\_bladder, tail\_3); movement criterion was set to 0.7;  
705 location criterion was set to 1.5<sup>(44)</sup>. Features were extracted using a custom R script, which is  
706 only possible within the development version of SimBA. Rheotaxis behavior was labeled (i.e.  
707 annotated were created for predictive classifiers) for each of the curated videos, but one was  
708 not annotated and was set aside for validation. The model was created by training it according  
709 to the default machine model settings, hyperparameters, and model evaluation settings listed in  
710 Scenario 1<sup>(44)</sup>. Model validation was done using the aforementioned curated video, its  
711 associated csv file that was previously set aside without annotation, and the model file that was  
712 just created. Throughout the video, the interactive plot was used to evaluate the probability  
713 threshold (i.e. the smallest peaks) where rheotaxis was accurately predicted by the model and

714 the minimum duration of each predicted rheotaxis event. These values became the  
715 discrimination threshold and minimum behavior bout length settings when we ran the machine  
716 model. All options were chosen during the analysis of the machine results and output files were  
717 saved in the project\_folder/ logs subdirectory. Subsequent analyses were performed in R using  
718 the csv data files located in the machine\_results subdirectory of the project/csv directory.

719 At this point the model was created and was used to predict rheotaxis on novel videos  
720 as outlined in Scenario 2: ([https://github.com/sgoldenlab/simba/blob/master/docs/Scenario2.md](https://github.com/sgoldenlab/simba/blob/master/docs/Scenario2.md#part-3-run-the-classifier-on-new-data)  
721 #part-3-run-the-classifier-on-new-data). Videos and data files were archived after they were  
722 processed and analyzed to avoid reanalyzing them when new videos and data were added for  
723 analysis.

724

## 725 *Data Analysis*

726 Because rheotaxis data were limited to instances when fish swam at angles  $0^\circ \pm 45^\circ$   
727 under flow conditions, they were compared to random swimming data of fish with a body angle  
728 of  $0^\circ \pm 45^\circ$  under no flow. The only exceptions to this procedure were for the angular  
729 comparisons among groups where the total data set of orientation angles was used to  
730 determine if the fish were randomly distributed under no flow (Fig. 3) or had a natural proclivity  
731 to orient toward the front of the arena, and the X-Y (2D) spatial use density plots under no flow  
732 (Fig. 6a) and flow (Fig. 6b). Time series data were quantized into 100 ms bins because it was  
733 the lowest common bin size for videos shot at 200 and 60 fps.

734 Data wrangling and cleaning was performed in R <sup>(45)</sup> with the packages tidyverse <sup>(46)</sup>,  
735 dplyr <sup>(47)</sup>, plyr <sup>(48)</sup>, and readbulk <sup>(49)</sup>. Figures and graphs were created with packages circular  
736 <sup>(50)</sup>, ggplot2 <sup>(51)</sup>, and viridis <sup>(52)</sup>. The Rayleigh statistical tests (V-test) of uniformity for circular  
737 data in a specified mean direction ( $\mu = 0^\circ$ ) and the Watson-Wheeler tests for differences in the  
738 grand mean body angle or angular variance (the test does not specify which parameter differs)

739 were performed with the package CircMLE<sup>(53)</sup>. The mean duration, number, total distance  
740 travelled and mean latency to the onset of rheotaxis events were calculated for 10 s bins (no  
741 flow, initial and final flow) using the SimBA developer version. The generalized linear mixed  
742 models with post hoc t-tests using the Satterthwaite method were performed in R with the  
743 packages lmerTest<sup>(54)</sup> and lme4<sup>(55)</sup>, and the significance values for fixed effects were done  
744 using stats<sup>(45)</sup> for type III ANOVAs. The packages zoo<sup>(56)</sup> and spectral<sup>(57)</sup> were used to  
745 convert data into times series and perform spectral decomposition analyses, respectively.

746

747 Declaration of interests:

748 The authors declare no competing financial or non-financial interests.

749

750 Acknowledgments: We would like to thank David Lee for editorial support and Mark Warchol for  
751 feedback on the manuscript. This work was supported by the National Institute on Deafness and  
752 Other Communication Disorders R01DC016066 (L.S.), NIDA R00DA045662 (S.A.G.), NIDA  
753 P30 DA048736 (S.R.O.N. and S.A.G.), NARSAD Young Investigator Award 27082 (S.A.G.).

754

## 755 REFERENCES

- 756 1 Chagnaud, B. P. & Coombs, S. in *The Lateral Line System* (eds Sheryl Coombs, Horst  
757 Bleckmann, Richard R. Fay, & Arthur N. Popper) 151-194 (Springer New York, 2014).
- 758 2 Van Trump, W. J. & McHenry, M. J. The lateral line system is not necessary for  
759 rheotaxis in the Mexican blind cavefish (*Astyanax fasciatus*). *Integr Comp Biol* **53**, 799-  
760 809, doi:10.1093/icb/ict064 (2013).
- 761 3 Lyon, E. P. ON RHEOTROPISM. I. — RHEOTROPISM IN FISHES. *American Journal of*  
762 *Physiology-Legacy Content* **12**, 149-161, doi:10.1152/ajplegacy.1904.12.2.149 (1904).
- 763 4 ARNOLD, G. P. RHEOTROPISM IN FISHES. *Biological Reviews* **49**, 515-576,  
764 doi:<https://doi.org/10.1111/j.1469-185X.1974.tb01173.x> (1974).
- 765 5 Suli, A., Watson, G. M., Rubel, E. W. & Raible, D. W. Rheotaxis in larval zebrafish is  
766 mediated by lateral line mechanosensory hair cells. *PLoS One* **7**, e29727,  
767 doi:10.1371/journal.pone.0029727 (2012).
- 768 6 Pavlov, D. & Tyuryukov, S. The role of lateral-line organs and equilibrium in the behavior  
769 and orientation of the dace, *Leuciscus leuciscus*, in a turbulent flow. *JOURNAL OF*  
770 *ICHTHYOLOGY C/C OF VOPROSY IKHTIOLOGII* **33**, 45-45 (1993).
- 771 7 Pavlov, D. S. & Tjurjukov, S. N. Reactions of dace to linear accelerations. *Journal of Fish*  
772 *Biology* **46**, 768-774, doi:<https://doi.org/10.1111/j.1095-8649.1995.tb01600.x> (1995).
- 773 8 John C. Montgomery, C. F. B. A. G. C. The lateral line can mediate rheotaxis in fish.  
774 *Nature*, 960-963 (1997).
- 775 9 Baker, C. F. & Montgomery, J. C. Lateral line mediated rheotaxis in the Antarctic fish  
776 *Pagothenia borchgrevinki*. *Polar Biology* **21**, 305-309, doi:10.1007/s003000050366  
777 (1999).
- 778 10 Baker, C. F. & Montgomery, J. C. The sensory basis of rheotaxis in the blind Mexican  
779 cave fish, *Astyanax fasciatus*. *Journal of Comparative Physiology A* **184**, 519-527,  
780 doi:10.1007/s003590050351 (1999).
- 781 11 Dykgraaf, S. Untersuchungen über die Funktion der Seitenorgane an Fischen. *Zeitschrift*  
782 *für vergleichende Physiologie* **20**, 162-214, doi:10.1007/BF00340757 (1933).
- 783 12 Bak-Coleman, J., Court, A., Paley, D. A. & Coombs, S. The spatiotemporal dynamics of  
784 rheotactic behavior depends on flow speed and available sensory information. *J Exp Biol*  
785 **216**, 4011-4024, doi:10.1242/jeb.090480 (2013).
- 786 13 Coombs, S., Bak-Coleman, J. & Montgomery, J. Rheotaxis revisited: a multi-behavioral  
787 and multisensory perspective on how fish orient to flow. *J Exp Biol* **223**,  
788 doi:10.1242/jeb.223008 (2020).
- 789 14 Coffin, A. B., Brignull, H., Raible, D. W. & Rubel, E. W. in *The Lateral Line System* (eds  
790 Sheryl Coombs, Horst Bleckmann, Richard R. Fay, & Arthur N. Popper) 313-347  
791 (Springer New York, 2014).
- 792 15 Harris, J. A. *et al.* Neomycin-Induced Hair Cell Death and Rapid Regeneration in the  
793 Lateral Line of Zebrafish (*Danio rerio*). *Journal of the Association for Research in*  
794 *Otolaryngology* **4**, 219-234, doi:10.1007/s10162-002-3022-x (2003).
- 795 16 Ma, E. Y., Rubel, E. W. & Raible, D. W. Notch Signaling Regulates the Extent of Hair  
796 Cell Regeneration in the Zebrafish Lateral Line. *The Journal of Neuroscience* **28**, 2261-  
797 2273, doi:10.1523/jneurosci.4372-07.2008 (2008).
- 798 17 Hardy, K. *et al.* Functional development and regeneration of hair cells in the zebrafish  
799 lateral line. *J Physiol* **599**, 3913-3936, doi:10.1113/JP281522 (2021).
- 800 18 Kniss, J. S., Jiang, L. & Piotrowski, T. Insights into sensory hair cell regeneration from  
801 the zebrafish lateral line. *Current Opinion in Genetics & Development* **40**, 32-40,  
802 doi:<https://doi.org/10.1016/j.gde.2016.05.012> (2016).

- 803 19 Pickett, S. B. & Raible, D. W. Water Waves to Sound Waves: Using Zebrafish to Explore  
804 Hair Cell Biology. *J Assoc Res Otolaryngol* **20**, 1-19, doi:10.1007/s10162-018-00711-1  
805 (2019).
- 806 20 Olive, R. *et al.* Rheotaxis of Larval Zebrafish: Behavioral Study of a Multi-Sensory  
807 Process. *Front Syst Neurosci* **10**, 14, doi:10.3389/fnsys.2016.00014 (2016).
- 808 21 Olszewski, J., Haehnel, M., Taguchi, M. & Liao, J. C. Zebrafish larvae exhibit rheotaxis  
809 and can escape a continuous suction source using their lateral line. *PLoS One* **7**,  
810 e36661, doi:10.1371/journal.pone.0036661 (2012).
- 811 22 Oteiza, P., Odstrcil, I., Lauder, G., Portugues, R. & Engert, F. A novel mechanism for  
812 mechanosensory-based rheotaxis in larval zebrafish. *Nature* **547**, 445-448,  
813 doi:10.1038/nature23014 (2017).
- 814 23 Hernández, P. P., Moreno, V., Olivari, F. A. & Allende, M. L. Sub-lethal concentrations of  
815 waterborne copper are toxic to lateral line neuromasts in zebrafish (*Danio rerio*). *Hearing*  
816 *Research* **213**, 1-10, doi:<https://doi.org/10.1016/j.heares.2005.10.015> (2006).
- 817 24 Linbo, T. L., Stehr, C. M., Incardona, J. P. & Scholz, N. L. Dissolved copper triggers cell  
818 death in the peripheral mechanosensory system of larval fish. *Environmental Toxicology*  
819 *and Chemistry* **25**, 597-603, doi:<https://doi.org/10.1897/05-241R.1> (2006).
- 820 25 Olivari, F. A., Hernández, P. P. & Allende, M. L. Acute copper exposure induces  
821 oxidative stress and cell death in lateral line hair cells of zebrafish larvae. *Brain*  
822 *Research* **1244**, 1-12, doi:<https://doi.org/10.1016/j.brainres.2008.09.050> (2008).
- 823 26 Williams, J. A. & Holder, N. Cell turnover in neuromasts of zebrafish larvae. *Hearing*  
824 *Research* **143**, 171-181, doi:[https://doi.org/10.1016/S0378-5955\(00\)00039-3](https://doi.org/10.1016/S0378-5955(00)00039-3) (2000).
- 825 27 Coffin, A. B., Rubel, E. W. & Raible, D. W. Bax, Bcl2, and p53 differentially regulate  
826 neomycin- and gentamicin-induced hair cell death in the zebrafish lateral line. *J Assoc*  
827 *Res Otolaryngol* **14**, 645-659, doi:10.1007/s10162-013-0404-1 (2013).
- 828 28 Buck, L. M., Winter, M. J., Redfern, W. S. & Whitfield, T. T. Ototoxin-induced cellular  
829 damage in neuromasts disrupts lateral line function in larval zebrafish. *Hear Res* **284**,  
830 67-81, doi:10.1016/j.heares.2011.12.001 (2012).
- 831 29 Bak-Coleman, J. & Coombs, S. Sedentary behavior as a factor in determining lateral line  
832 contributions to rheotaxis. *J Exp Biol* **217**, 2338-2347, doi:10.1242/jeb.102574 (2014).
- 833 30 Elder, J. & Coombs, S. The influence of turbulence on the sensory basis of rheotaxis. *J*  
834 *Comp Physiol A Neuroethol Sens Neural Behav Physiol* **201**, 667-680,  
835 doi:10.1007/s00359-015-1014-7 (2015).
- 836 31 Beck, J. C., Gilland, E., Tank, D. W. & Baker, R. Quantifying the Ontogeny of Optokinetic  
837 and Vestibuloocular Behaviors in Zebrafish, Medaka, and Goldfish. *Journal of*  
838 *Neurophysiology* **92**, 3546-3561, doi:10.1152/jn.00311.2004 (2004).
- 839 32 Mo, W., Chen, F., Nechiporuk, A. & Nicolson, T. Quantification of vestibular-induced eye  
840 movements in zebrafish larvae. *BMC Neurosci* **11**, 110, doi:10.1186/1471-2202-11-110  
841 (2010).
- 842 33 Liao, J. C. The role of the lateral line and vision on body kinematics and hydrodynamic  
843 preference of rainbow trout in turbulent flow. *J Exp Biol* **209**, 4077-4090,  
844 doi:10.1242/jeb.02487 (2006).
- 845 34 Toro, C. *et al.* Dopamine Modulates the Activity of Sensory Hair Cells. *J Neurosci* **35**,  
846 16494-16503, doi:10.1523/JNEUROSCI.1691-15.2015 (2015).
- 847 35 Zhang, Q. *et al.* Synaptically silent sensory hair cells in zebrafish are recruited after  
848 damage. *Nat Commun* **9**, 1388, doi:10.1038/s41467-018-03806-8 (2018).
- 849 36 Hernandez, P. P. *et al.* Sublethal concentrations of waterborne copper induce cellular  
850 stress and cell death in zebrafish embryos and larvae. *Biological Research* **44**, 7-15  
851 (2011).

- 852 37 Johansen, J. L., Fulton, C. J. & Bellwood, D. R. Avoiding the flow: refuges expand the  
853 swimming potential of coral reef fishes. *Coral Reefs* **26**, 577-583, doi:10.1007/s00338-  
854 007-0217-y (2007).
- 855 38 Webb, P. W. Entrainment by river chub nocomis micropogon and smallmouth bass  
856 micropterus dolomieu on cylinders. *J Exp Biol* **201 (Pt 16)**, 2403-2412 (1998).
- 857 39 Burt de Perera, T. B. & Braithwaite, V. A. Laterality in a non-visual sensory modality--the  
858 lateral line of fish. *Curr Biol* **15**, R241-242, doi:10.1016/j.cub.2005.03.035 (2005).
- 859 40 Nusslein-Volhard, C. & Dahm, R. *Zebrafish*. (Oxford University Press, 2002).
- 860 41 Budick, S. A. & O'Malley, D. M. Locomotor repertoire of the larval zebrafish: swimming,  
861 turning and prey capture. *Journal of Experimental Biology* **203**, 2565-2579,  
862 doi:10.1242/jeb.203.17.2565 (2000).
- 863 42 Mathis, A. *et al.* DeepLabCut: markerless pose estimation of user-defined body parts  
864 with deep learning. *Nature Neuroscience* **21**, 1281-1289, doi:10.1038/s41593-018-0209-  
865 y (2018).
- 866 43 Nath, T. *et al.* Using DeepLabCut for 3D markerless pose estimation across species and  
867 behaviors. *Nature Protocols* **14**, 2152-2176, doi:10.1038/s41596-019-0176-0 (2019).
- 868 44 Nilsson, S. R. O. *et al.*, doi:10.1101/2020.04.19.049452 (2020).
- 869
- 870 45 R Core Team (2020). R: A language and environment for statistical computing. R  
871 Foundation for Statistical Computing, Vienna, Austria. URL <https://www.R-project.org/>.
- 872 46 Wickham et al., (2019). Welcome to the tidyverse. *Journal of Open Source Software*,  
873 4(43), 1686, <https://doi.org/10.21105/joss.01686>
- 874 47 Wickham, H., François, R., Henry, L., and Müller, K. (2021). dplyr: A Grammar of Data  
875 Manipulation. R package version 1.0.3. <https://CRAN.R-project.org/package=dplyr>
- 876 48 Wickham, H. (2011). The Split-Apply-Combine Strategy for Data Analysis. *Journal of*  
877 *Statistical Software*, 40(1), 1-29. URL <http://www.jstatsoft.org/v40/i01/>.
- 878 49 Kieslich, P. J., and Henninger, F. (2016). Readbulk: An R package for reading and  
879 combining multiple data files. <https://doi.org/10.5281/zenodo.596649>
- 880 50 Agostinelli C. and Lund, U. (2017). R package 'circular': Circular Statistics (version 0.4-  
881 93). URL <https://r-forge.r-project.org/projects/circular/>
- 882 51 Wickham, H. ggplot2: Elegant Graphics for Data Analysis. Springer-Verlag New York,  
883 2016.
- 884 52 Garnier, S. (2018). viridis: Default Color Maps from 'matplotlib'. R package version  
885 0.5.1. <https://CRAN.R-project.org/package=viridis>
- 886 53 Fitak, R. R. and Johnsen, S. (2017). Bringing the analysis of animal orientation data full  
887 circle: model-based approaches with maximum likelihood. *Journal of Experimental*  
888 *Biology*, 220, 3878-3882. doi:10.1242/jeb.167056
- 889 54 Kuznetsova A, Brockhoff PB, Christensen RHB (2017). "lmerTest Package: Tests in  
890 Linear Mixed Effects Models." *Journal of Statistical Software*, 82(13), 1-26. doi:  
891 10.18637/jss.v082.i13 (URL:<https://doi.org/10.18637/jss.v082.i13>).
- 892 55 Bates, D., Maechler, M., Bolker, B., Walker, S. (2015). Fitting Linear Mixed-Effects  
893 Models Using lme4. *Journal of Statistical Software*, 67(1), 1-48.  
894 doi:10.18637/jss.v067.i01.
- 895 56 Zeileis, A. and Grothendieck, G. (2005). zoo: S3 Infrastructure for Regular and Irregular  
896 Time Series. *Journal of Statistical Software*, 14(6), 1-27. doi:10.18637/jss.v014.i06
- 897 57 Seilmayer, M. (2021). spectral: Common Methods of Spectral Data Analysis. R package  
898 version 2.0. <https://CRAN.R-project.org/package=spectral>  
899

900 **SUPPLEMENTARY INFORMATION**

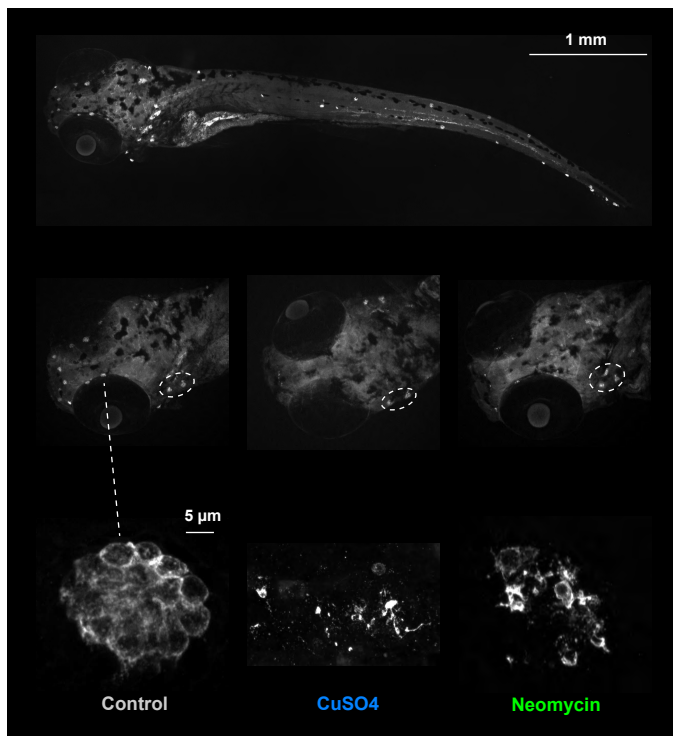

901

902 **Supplementary Figure 1. Visualization of neuromast hair cell loss following CuSO<sub>4</sub> or neomycin treatment.** Representative  
903 confocal images of hair cells (anti-Otoferlin immunolabel) confirmed the presence (control) or absence (CuSO<sub>4</sub>, neomycin) of the  
904 sensory hair cells in the neuromasts of the lateral line in larval zebrafish. Also labeled are patches of hair cells not part of the lateral  
905 line that are within the ears and remain intact (cristae; dashed circles). Supraorbital neuromast #2 shown in detail.

906

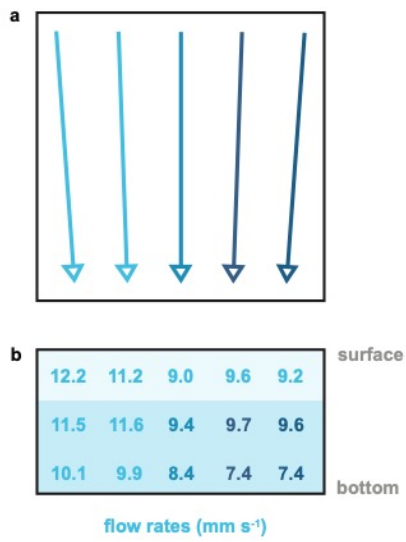

907

908

909

910

911

912

**Supplementary Figure 2. Visualization of methylene blue dye tests within the experimental arena shows a laminar yet non-uniform flow field.** a) The vectors are color coded according to the mean of the b) cross-sectional flow values ( $\text{mm s}^{-1}$ ) from top to bottom. Each cross-sectional flow value (b) is the mean of five trials. Fish typically occupied the dark shaded area in the bottom two-thirds of the water column and very rarely swam near the surface.



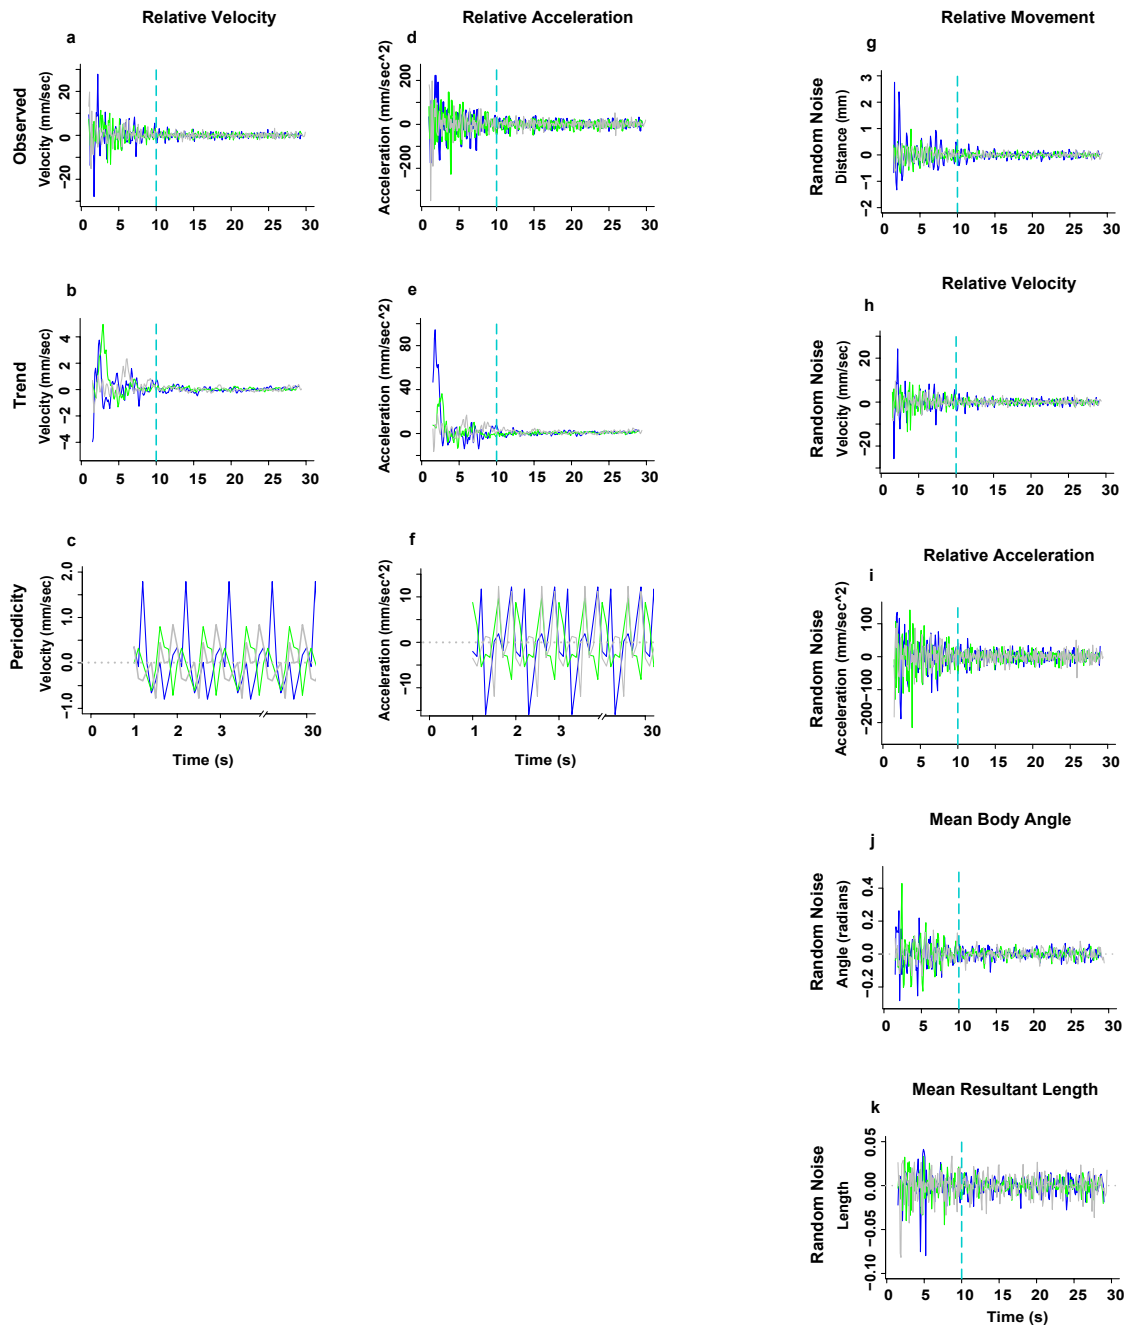

913

914 **Supplementary Figure 3. The overall trends and periodic fluctuations in the relative velocity and acceleration in rheotaxis**  
 915 **behavior differed among treatment groups.** Gray = control, blue = CuSO<sub>4</sub>, green = neomycin. Spectral decomposition of the  
 916 observed data (a, d) removed the noise (h, i) to reveal the overall underlying trends (b, e) and the periodicity, or recurring  
 917 fluctuations (c, f) that occurred during any given 1 s of the experiment. The periodicity waveform peaks indicate the average amount  
 918 (amplitude), number, direction (positive = increasing; negative = decreasing), and order of occurrence for these cyclic fluctuations as  
 919 a function of unit time (1 s). The overall trends were that there were no differences in relative (b) velocity or (e) acceleration among  
 920 groups. The periodic fluctuation in relative velocity (c) and acceleration (f) was greatest in CuSO<sub>4</sub> treated fish compared to control or  
 921 neomycin treated fish. The noise for relative movement (g), mean body angle (j), and mean resultant length (k) are shown.

922

|                   | No Flow Stimulus<br>1-10s<br><i>theta, rho, ang var</i> | Flow Stimulus<br>11-20s<br><i>theta, rho, ang var</i> | Flow Stimulus<br>21-30s<br><i>theta, rho, ang var</i> |
|-------------------|---------------------------------------------------------|-------------------------------------------------------|-------------------------------------------------------|
| Control           | 135.5°<br>0.084<br>0.916                                | 357.9°<br>0.687<br>0.313                              | 1.7°<br>0.688<br>0.312                                |
| CuSO <sub>4</sub> | 84.8 °<br>0.099<br>0.901                                | 10.8°<br>0.530<br>0.470                               | 3.1°<br>0.611<br>0.389                                |
| Neomycin          | 86.7°<br>0.090<br>0.900                                 | 6.1°<br>0.656<br>0.344                                | 6.7°<br>0.655<br>0.345                                |

923

924

925

926

927

928

929

**Supplementary Table 1.** Grand mean body angle vector parameters. *Theta* = group mean body angle; *rho* = mean length of resultant vector, where 0 = uniform distribution of individual mean body angles, 1 = perfect alignment individual mean body angles; angular variance =  $1-\rho$ .

930

|                   | No Flow Stimulus<br>1-10s<br>test stat, p-value | Flow Stimulus<br>11-20s<br>test stat, p-value | Flow Stimulus<br>21-30s<br>test stat, p-value |
|-------------------|-------------------------------------------------|-----------------------------------------------|-----------------------------------------------|
| Control           | -0.0595<br>0.9079                               | 0.686<br>< 0.001                              | 0.6678<br>< 0.001                             |
| CuSO <sub>4</sub> | 0.009<br>0.4276                                 | 0.5204<br>< 0.001                             | 0.6105<br>< 0.001                             |
| Neomycin          | 0.0052<br>0.4566                                | 0.6522<br>< 0.001                             | 0.6507<br>< 0.001                             |

931

932

933

934

935

936

**Supplementary Table 2.** Rayleigh test of uniformity (V-test) for an expected grand mean body angle,  $\mu = 0^\circ$ . Among all treatments, groups under no flow were not significantly aligned to  $0^\circ$ , whereas groups under flow conditions were significantly aligned to  $0^\circ$ .

937

|                      | CTL-10s<br>p-value | CTL-20s<br>p-value | Cu-10s<br>p-value | Cu-20s<br>p-value | Neo-10s<br>p-value | Neo-20s<br>p-value |
|----------------------|--------------------|--------------------|-------------------|-------------------|--------------------|--------------------|
| CTL-10s<br>test stat | -                  | 0.4747             | <b>2.58e-05</b>   | 0.119             | <b>0.0357</b>      | >0.10              |
| CTL-20s<br>test stat | 1.49               | -                  | <b>7.041e-05</b>  | <b>0.0508</b>     | 0.07419            | 0.4502             |
| Cu-10s<br>test stat  | 21.128             | 19.122             | -                 | 0.04975           | 0.05861            | <b>0.0090</b>      |
| Cu-20s<br>test stat  | 4.2573             | 5.9597             | 6.0014            | -                 | 0.311              | 0.1921             |
| Neo-10s<br>test stat | 6.6655             | 5.2022             | 5.6737            | 2.3357            | -                  | 0.7364             |
| Neo-20s<br>test stat | 0.1251             | 1.5961             | 9.4268            | 3.3000            | 0.61196            | -                  |

938

939

940

941

**Supplementary Table 3.** Watson Wheeler test for differences in either grand mean body angle or the distribution of the individual mean angles (*the test does not specify*) among treatment groups under flow conditions.

942

| GLMM                                          | Estimate | Std. Error | df   | t value | Pr(> t )              |
|-----------------------------------------------|----------|------------|------|---------|-----------------------|
| Stimulus (No flow v Flow 10s)                 | 1.14950  | 0.10746    | 1390 | 10.697  | <b>&lt; 2e-16 ***</b> |
| Stimulus (No flow v Flow 20s)                 | 1.62296  | 0.10746    | 1390 | 15.102  | <b>&lt; 2e-16 ***</b> |
| Treatment (Control v CuSO <sub>4</sub> )      | 0.05485  | 0.11893    | 2068 | 0.461   | 0.64473               |
| Treatment (Control v Neomycin)                | 0.04574  | 0.11507    | 2068 | 0.398   | 0.69103               |
| Stim*Treat (CTL-10s v CuSO <sub>4</sub> -10s) | -0.34246 | 0.16277    | 1390 | -2.104  | <b>0.03556 *</b>      |
| Stim*Treat (CTL-20s v CuSO <sub>4</sub> -20s) | -0.45260 | 0.16277    | 1390 | -2.781  | <b>0.00550 **</b>     |
| Stim*Treat (CTL-10s v Neo-10s)                | -0.29562 | 0.15749    | 1390 | -1.877  | <b>0.06072 .</b>      |
| Stim*Treat (CTL-20s v Neo-20s)                | -0.36519 | 0.15749    | 1390 | -2.319  | <b>0.02055 *</b>      |

943

| ANOVA (III) | Sum Sq | Mean Sq | NumDF | DenDF | F value  | Pr(>F)                  |
|-------------|--------|---------|-------|-------|----------|-------------------------|
| Stimulus    | 660.88 | 330.44  | 2     | 1390  | 216.7689 | <b>&lt; 2.2e-16 ***</b> |
| Treatment   | 29.83  | 14.92   | 2     | 695   | 9.7842   | <b>6.449e-05 ***</b>    |
| Stim*Treat  | 15.40  | 3.85    | 4     | 1390  | 2.5249   | <b>0.03926 *</b>        |

944

945

946

947

948

**Supplementary Table 4.** Generalized Linear Mixed Model with Satterthwaite's method of testing for differences among treatments in the mean duration of rheotaxis events. Type III ANOVA yielded significance values for fixed effects and interactions because the LME4 package in R does not identify them in its output. Significance codes: '\*\*\*\*' 0.001, '\*\*\*' 0.01, '\*\*' 0.05, '.' 0.1

949

| GLMM                                          | Estimate | Std. Error | df   | t value | Pr(> t )              |
|-----------------------------------------------|----------|------------|------|---------|-----------------------|
| Stimulus (No flow v Flow 10s)                 | 2.65530  | 0.15538    | 1390 | 17.089  | <b>&lt; 2e-16 ***</b> |
| Stimulus (No flow v Flow 20s)                 | 2.91667  | 0.15538    | 1390 | 18.771  | <b>&lt; 2e-16 ***</b> |
| Treatment (Control v CuSO <sub>4</sub> )      | -0.52696 | 0.21170    | 1614 | -2.489  | <b>0.0129 *</b>       |
| Treatment (Control v Neomycin)                | 0.46123  | 0.20484    | 1614 | 2.252   | <b>0.0245 *</b>       |
| Stim*Treat (CTL-10s v CuSO <sub>4</sub> -10s) | -0.57687 | 0.23535    | 1390 | -2.451  | <b>0.0144 *</b>       |
| Stim*Treat (CTL-20s v CuSO <sub>4</sub> -20s) | 0.05882  | 0.23535    | 1390 | 0.250   | 0.8027                |
| Stim*Treat (CTL-10s v Neo-10s)                | 0.09687  | 0.22772    | 1390 | 0.425   | 0.6706                |
| Stim*Treat (CTL-20s v Neo-20s)                | 0.05290  | 0.22772    | 1390 | 0.232   | 0.8163                |

950

| ANOVA (III) | Sum Sq | Mean Sq | NumDF | DenDF | F value  | Pr(>F)                  |
|-------------|--------|---------|-------|-------|----------|-------------------------|
| Stimulus    | 3488.9 | 1744.46 | 2     | 1390  | 547.3568 | <b>&lt; 2.2e-16 ***</b> |
| Treatment   | 167.1  | 83.57   | 2     | 695   | 26.2224  | <b>1.049e-11 ***</b>    |
| Stim*Treat  | 40.0   | 9.99    | 4     | 1390  | 3.1356   | <b>0.01403 *</b>        |

951

952

953

954

955

**Supplementary Table 5.** Generalized Linear Mixed Model with Satterthwaite's method of testing for differences among treatments in the mean number of rheotaxis events. Type III ANOVA yielded significance values for fixed effects and interactions because the LME4 package in R does not identify them in its output. Significance codes: '\*\*\*\*' 0.001, '\*\*\*' 0.01, '\*\*' 0.05, '.' 0.1

956

| GLMM                                     | Estimate | Std. Error | df   | t value | Pr(> t )            |
|------------------------------------------|----------|------------|------|---------|---------------------|
| Stimulus (No flow v Flow 10s)            | 0.70177  | 0.16338    | 1721 | 4.295   | <b>1.84e-05 ***</b> |
| Stimulus (No flow v Flow 20s)            | 0.65449  | 0.16338    | 1721 | 4.006   | <b>6.44e-05 ***</b> |
| Treatment (Control v CuSO <sub>4</sub> ) | 0.18141  | 0.11436    | 695  | 1.586   | 0.11313             |
| Treatment (Control v Neomycin)           | 0.30691  | 0.11102    | 706  | 2.764   | <b>0.00585 **</b>   |

957

| ANOVA (III) | Sum Sq  | Mean Sq | NumDF | DenDF | F value | Pr(>F)                  |
|-------------|---------|---------|-------|-------|---------|-------------------------|
| Stimulus    | 243.652 | 81.037  | 2     | 1565  | 38.8494 | <b>&lt; 2.2e-16 ***</b> |
| Treatment   | 8.117   | 3.796   | 2     | 699   | 3.8913  | <b>0.02086 *</b>        |

958

959

960

961

962

963

**Supplementary Table 6.** Generalized Linear Mixed Model with Satterthwaite's method of testing for differences among treatments in the total distance travelled during rheotaxis events. GLMM model had no interaction between stimulus and treatment. Type III ANOVA yielded significance values for fixed effects because the LME4 package in R does not identify them in its output. Significance codes: '\*\*\*' 0.001, '\*\*' 0.01, '\*' 0.05, '.' 0.1

964

| GLMM                                          | Estimate   | Std. Error | df        | t value | Pr(> t )            |
|-----------------------------------------------|------------|------------|-----------|---------|---------------------|
| Stimulus (No flow v Flow 10s)                 | 8.460e+00  | 3.333e-01  | 2.085e+03 | 25.386  | < 2e-16 ***         |
| Stimulus (No flow v Flow 20s)                 | 1.762e+01  | 3.333e-01  | 2.085e+03 | 52.882  | < 2e-16 ***         |
| Treatment (Control v CuSO <sub>4</sub> )      | -1.384e+00 | 3.569e-01  | 2.085e+03 | -3.877  | <b>0.000109</b> *** |
| Treatment (Control v Neomycin)                | 8.802e-03  | 2.085e+03  | 2.085e+03 | 0.025   | 0.979669            |
| Stim*Treat (CTL-10s v CuSO <sub>4</sub> -10s) | .904e-01   | 5.048e-01  | 2.085e+03 | 0.972   | 0.331412            |
| Stim*Treat (CTL-20s v CuSO <sub>4</sub> -20s) | 1.015e+00  | 5.048e-01  | 2.085e+03 | 2.011   | <b>0.044503</b> *   |
| Stim*Treat (CTL-10s v Neo-10s)                | -4.100e-02 | 4.884e-01  | 2.085e+03 | -0.084  | 0.933106            |
| Stim*Treat (CTL-20s v Neo-20s)                | 8.078e-02  | 4.884e-01  | 2.085e+03 | 0.165   | 0.868645            |

965

| ANOVA (III) | Sum Sq | Mean Sq | NumDF | DenDF | F value  | Pr(>F)               |
|-------------|--------|---------|-------|-------|----------|----------------------|
| Stimulus    | 112476 | 56238   | 2     | 2089  | 3834.664 | < 2.2e-16 ***        |
| Treatment   | 345    | 173     | 2     | 2089  | 11.764   | <b>8.306e-06</b> *** |

966

967

968

969

970

971

**Supplementary Table 7.** Generalized Linear Mixed Model with Satterthwaite's method of testing for differences among treatments in the mean latency to the onset of first rheotaxis event. GLMM model had no interaction between stimulus and treatment. Type III ANOVA yielded significance values for fixed effects and interactions because the LME4 package in R does not identify them in its output. Significance codes: '\*\*\*' 0.001, '\*\*' 0.01, '\*' 0.05, '.' 0.1



| GLM                                                    | Estimate | Std. Error | t value | Pr(> t )            |
|--------------------------------------------------------|----------|------------|---------|---------------------|
| Treatment (Control v <b>CuSO<sub>4</sub></b> )         | 31.9668  | 4.4820     | 7.132   | <b>1.21e-12 ***</b> |
| Treatment (Control v <b>Neomycin</b> )                 | 14.6849  | 4.0870     | 3.593   | <b>0.000332 ***</b> |
| ROI (Back v Center)                                    | 4.6943   | 4.7014     | 0.998   | 0.318122            |
| ROI (Back v Front)                                     | -6.3503  | 4.7014     | -1.351  | 0.176878            |
| ROI (Back v Left)                                      | -13.8344 | 4.7014     | -2.943  | <b>0.003278 **</b>  |
| ROI (Back v Right)                                     | 7.7325   | 4.7014     | -1.645  | 0.100126            |
| ROI*Treat (CTL-Back v <b>CuSO<sub>4</sub></b> -Center) | 10.2432  | 6.3386     | 1.616   | 0.106188            |
| ROI*Treat (CTL-Back v <b>Neo</b> -Center)              | 733.35   | 5.7799     | 3.287   | <b>0.001023 **</b>  |
| ROI*Treat (CTL-Back v <b>CuSO<sub>4</sub></b> -Front)  | 18.9995  | 6.3386     | -4.265  | <b>2.05e-05 ***</b> |
| ROI*Treat (CTL-Back v <b>Neo</b> -Front)               | -27.0351 | 5.7799     | 0.146   | 0.884161            |
| ROI*Treat (CTL-Back v <b>CuSO<sub>4</sub></b> -Left)   | -23.8271 | 6.3386     | -3.759  | <b>0.000174 ***</b> |
| ROI*Treat (CTL-Back v <b>Neo</b> -Left)                | -13.3969 | 5.7799     | -2.318  | <b>0.020519 *</b>   |
| ROI*Treat (CTL-Back v <b>CuSO<sub>4</sub></b> -Right)  | -21.5175 | 6.3386     | -3.395  | <b>0.000695 ***</b> |
| ROI*Treat (CTL-Back v <b>Neo</b> -Right)               | -10.7854 | 5.7799     | -1.866  | <b>0.062127 .</b>   |

972

| ANOVA (III)   | Sum Sq | Mean Sq | Df | F value | Pr(>F)                  |
|---------------|--------|---------|----|---------|-------------------------|
| Treatment     | 172565 | 86283   | 2  | 49.727  | <b>&lt; 2.2e-16 ***</b> |
| ROI           | 778750 | 194687  | 4  | 112.204 | <b>&lt; 2.2e-16 ***</b> |
| Treatment*ROI | 135133 | 16892   | 8  | 9.735   | <b>1.93e-13 ***</b>     |

973

974

**Supplementary Table 8.** Generalized Linear Model tests for differences in the two-dimensional X-Y spatial use among treatments.

975

GLM model included fixed effects of stimulus and treatment, and the effect of the interaction between stimulus and treatment.

976

ANOVA yielded significance values for fixed effects and interactions because the LME4 package in R does not identify them in its

977

output. Significance codes: '\*\*\*' 0.001, '\*\*' 0.01, '\*' 0.05, '.' 0.1

978

|          | Control  | Control | Control | CuSO <sub>4</sub> | CuSO <sub>4</sub> | CuSO <sub>4</sub> | Cu-Ctl  | Cu-Ctl          | Neomycin | Neomycin | Neomycin | Neo-Ctl | Neo-Ctl         |
|----------|----------|---------|---------|-------------------|-------------------|-------------------|---------|-----------------|----------|----------|----------|---------|-----------------|
| Variable | Min      | Max     | Range   | Min               | Max               | Range             | ΔRange  | ΔRange (factor) | Min      | Max      | Range    | ΔRange  | ΔRange (factor) |
| mov      | -0.0431  | 0.0583  | 0.1014  | -0.0724           | 0.1547            | 0.2270            | 0.1257  | <b>2.2400</b>   | -0.0414  | 0.0441   | 0.0855   | -0.0158 | <i>0.8437</i>   |
| vel      | -0.7762  | 0.8416  | 1.6178  | -0.7991           | 1.7910            | 2.5900            | 0.9723  | <b>1.6010</b>   | -0.7129  | 0.7997   | 1.5126   | -0.1051 | <i>0.9350</i>   |
| acc      | -11.8950 | 12.3300 | 24.2250 | -15.8962          | 12.1951           | 28.0914           | 3.8664  | <b>1.1596</b>   | -8.1738  | 9.7733   | 17.9471  | -6.2779 | <i>0.7409</i>   |
| angle    | -0.0158  | 0.0107  | 0.0265  | -0.0087           | 0.0145            | 0.0231            | -0.0034 | <i>0.8729</i>   | -0.0162  | 0.0256   | 0.0418   | 0.0153  | <b>1.5766</b>   |
| res L    | -0.0052  | 0.0075  | 0.0127  | -0.0038           | 0.0023            | 0.0061            | -0.0066 | <i>0.4832</i>   | -0.0026  | 0.0028   | 0.0054   | -0.0074 | <i>0.4219</i>   |

979

980

**Supplementary Table 9** (Based on Fig. 8c, g, k, o, s). Lateral line ablation by drug treatment (Cu, Neo) shifts the range in overall amplitude of linear (*mov*, *vel*, *acc*) and angular (*angle*, *res L*) seasonality data relative to those of the control (Ctl) group. Movement parameters in which the amplitude increased in treatment fish relative to controls are indicated in **bold**, whereas those that decreased are in *italics*.

981

982

983

984

985

986

987

988

989

990

991

992

993

994

995

996

997

998

999

1000

|          |               | Control    | CuSO <sub>4</sub> | Cu-Ctl        | Cu-Ctl             | Neomycin | Neo-Ctl        | Neo-Ctl            | Control  | CuSO <sub>4</sub> | Cu-Ctl          | Cu-Ctl            | Neomycin | Neo-Ctl         | Neo-Ctl           |
|----------|---------------|------------|-------------------|---------------|--------------------|----------|----------------|--------------------|----------|-------------------|-----------------|-------------------|----------|-----------------|-------------------|
| Variable | Dominant Peak | Freq (1/s) | Freq              | ΔFreq (1/s)   | Net Shift Freq 1-3 | Freq     | ΔFreq (1/s)    | Net Shift Freq 1-3 | Power    | Power             | ΔPower (factor) | Net Shift Pwr 1-3 | Power    | ΔPower (factor) | Net Shift Pwr 1-3 |
| mov      | 1st           | 0.1567     | 0.1528            | -0.0039       | down               | 0.2118   | 0.0551         | down               | 0.0169   | 0.0448            | <b>2.6475</b>   | up                | 0.0337   | <b>1.9964</b>   | up                |
| mov      | 2nd           | 0.0267     | 0.1042            | 0.0775        | -                  | 0.0139   | -0.0128        | -                  | 0.0101   | 0.0326            | <b>3.2379</b>   | -                 | 0.0139   | <b>1.3814</b>   | -                 |
| mov      | 3rd           | 0.2533     | 0.0208            | -0.2325       | -                  | 0.1632   | -0.0901        | -                  | 0.0082   | 0.0287            | <b>3.5016</b>   | -                 | 0.0129   | <b>1.5777</b>   | -                 |
| vel      | 1st           | 0.2533     | 0.1563            | -0.0971       | down               | 0.2118   | -0.0415        | down               | 1.8444   | 3.1181            | <b>1.6906</b>   | up                | 6.9068   | <b>3.7447</b>   | up                |
| vel      | 2nd           | 1.8444     | 0.2604            | -1.5840       | -                  | 0.4792   | -1.3652        | -                  | 1.5272   | 2.5076            | <b>1.6419</b>   | -                 | 1.4930   | <b>0.9776</b>   | -                 |
| vel      | 3rd           | 0.3100     | 0.2118            | -0.0982       | -                  | 0.1632   | -0.1468        | -                  | 0.7717   | 1.9820            | <b>2.5683</b>   | -                 | 1.3884   | <b>1.7991</b>   | -                 |
| acc      | 1st           | 0.2500     | 0.2604            | 0.0104        | down               | 0.2118   | -0.0382        | down               | 363.7884 | 502.2213          | <b>1.3805</b>   | up                | 938.4990 | <b>2.5798</b>   | up                |
| acc      | 2nd           | 0.4800     | 0.3056            | -0.1744       | -                  | 0.4410   | -0.0390        | -                  | 244.0334 | 402.0855          | <b>1.6477</b>   | -                 | 393.4430 | <b>1.6123</b>   | -                 |
| acc      | 3rd           | 0.3100     | 0.1458            | -0.1642       | -                  | 0.2847   | -0.0253        | -                  | 204.4871 | 304.1066          | <b>1.4872</b>   | -                 | 346.3958 | <b>1.6940</b>   | -                 |
| angle    | 1st           | 0.0400     | 0.0382            | -0.0018       | up                 | 0.0174   | -0.0226        | up                 | 0.0029   | 0.0042            | <b>1.4571</b>   | up                | 0.0040   | <b>1.3874</b>   | up                |
| angle    | 2nd           | 0.0700     | 0.1528            | <b>0.0828</b> | -                  | 0.1250   | <b>0.0550</b>  | -                  | 0.0026   | 0.0014            | <b>0.5371</b>   | -                 | 0.0028   | <b>1.0712</b>   | -                 |
| angle    | 3rd           | 0.1167     | 0.2083            | <b>0.0917</b> | -                  | 0.1944   | <b>0.0778</b>  | -                  | 0.0009   | 0.0009            | <b>1.0510</b>   | -                 | 0.0014   | <b>1.6840</b>   | -                 |
| res L    | 1st           | 0.0600     | 0.0313            | -0.0288       | down               | 0.1319   | <b>0.0719</b>  | up                 | 0.0002   | 0.0002            | <b>1.3167</b>   | up                | 0.0001   | <i>0.4215</i>   | down              |
| res L    | 2nd           | 0.3433     | 0.0625            | -0.2808       | -                  | 0.2396   | <b>-0.1038</b> | -                  | 0.0001   | 0.0001            | <b>1.7516</b>   | -                 | 0.0000   | <i>0.7071</i>   | -                 |
| res L    | 3rd           | 0.1667     | 0.1319            | -0.0347       | -                  | 0.4097   | <b>0.2431</b>  | -                  | 0.0001   | 0.0001            | <b>1.3909</b>   | -                 | 0.0000   | <i>0.6849</i>   | -                 |

1001  
1002  
1003  
1004  
1005  
1006  
1007  
1008

**Supplementary Table 10** (based on Fig. 9). The primary, secondary, and tertiary dominant frequencies (*Freq*) of the linear (*mov*, *vel*, *acc*) and angular (*angle*, *res L*) movement power spectra shift up or down ( $\Delta Freq$ ) in each of the drug treatments (**Cu**, **Neo**) compared to the control (**Ctl**) group. The peak power (*Pwr*) for all dominant frequencies increases ( $+\Delta Pwr$ ) in nearly all cases. Values for the net shift in frequency and power were determined by adding the values of the +/- relative shift ( $\Delta$ Frequency,  $\Delta$ Power) of all three dominant frequencies and generalizing the overall shift in frequency and power as “up” or “down”. The trend of CuSO<sub>4</sub> and neomycin ablation results in net downshifts in the frequency and net upshift in power of relative movement, velocity and acceleration and a net upshift in the frequency and power of the mean body angle. However, CuSO<sub>4</sub> ablation results in a net downshift in the frequency and net upshift in power, whereas neomycin results in a net upshift in the frequency and net downshift in power. Movement parameters in which the amplitude increased in treatment fish relative to controls are indicated in **bold**, whereas those that decreased are in *italics*.

1009

|                            |                       | Control                  | Control                                      | CuSO <sub>4</sub>        | CuSO <sub>4</sub>                            | Neomycin                 | Neomycin                                     |
|----------------------------|-----------------------|--------------------------|----------------------------------------------|--------------------------|----------------------------------------------|--------------------------|----------------------------------------------|
| Linear parameter reference | Angular parameter CCF | Lag: (+/-) before, after | Heading: right, left<br>Variance: more, less | Lag: (+/-) before, after | Heading: right, left<br>Variance: more, less | Lag: (+/-) before, after | Heading: right, left<br>Variance: more, less |
| movement                   | body angle            | before                   | left                                         | <i>after</i>             | <i>left</i>                                  | <i>after</i>             | <i>right</i>                                 |
| movement                   | resultant length      | before                   | less                                         | <b>before</b>            | <b>less</b>                                  | <i>after</i>             | <i>less</i>                                  |
| velocity                   | body angle            | simultaneous             | right                                        | <i>after</i>             | <i>right</i>                                 | <b>after</b>             | <b>left</b>                                  |
| velocity                   | resultant length      | before                   | less                                         | <i>after</i>             | <i>less</i>                                  | <b>before</b>            | <b>less</b>                                  |
| acceleration               | body angle            | <b>after</b>             | <b>left</b>                                  | <i>after</i>             | <i>right</i>                                 | <b>after</b>             | <b>left</b>                                  |
| acceleration               | resultant length      | <b>before</b>            | <b>less</b>                                  | <i>after</i>             | <i>less</i>                                  | <b>before</b>            | <b>less</b>                                  |

1010

1011

1012

1013

1014

1015

1016

**Supplementary Table 11** (based on Fig. 10). The method, and perhaps mechanism, of lateral line ablation by CuSO<sub>4</sub> and neomycin results in two distinct type of rheotaxis kinematics that are different from control fish. Each method has the opposite effect on the linear and angular movement parameters during rheotaxis and neither matches the phenotype of fish with an intact lateral line. Behavioral phenotypes in which an above average increase in the indicated linear variable was strongly correlated with a leftward heading that will occur later and a decrease in angular variance that occurred previously are indicated in **bold**. Phenotypes in which an above average increase in the indicated linear variable was strongly correlated with a rightward heading and a decrease in angular variance that will occur later are indicated in *italics*.
